# Supplementary material for: CaBP1 and 2 enable sustained CaV1.3 calcium currents and synaptic transmission in inner hair cells
Source: eLife. 2024 Dec 24;13:RP93646. doi: 10.7554/eLife.93646 (PMC11668525; doi:10.7554/eLife.93646)
Supplement: Figure 3—source data 1. [file elife-93646-fig3-data1.xlsx]

## Sheet: -85mV
	CaBP12-DKO	ddur1_all_sort	dCMS1_all_sort	Qreal1_all_sort	efficiency	eff_mean	eff_sem	ddur (ms)			KO-INJ	ddur1_all_sort	dCMS1_all_sort	Qreal1_all_sort	efficiency	eff_mean	eff_sem	ddur (ms)			WT	ddur1_all_sort	dCMS1_all_sort	Qreal1_all_sort	efficiency	eff_mean	eff_sem	ddur (ms)
		0.002	-0.200897	0.178403	-1.12609	13.1033	4.01052	2				0.002	-2.83538	0.235833	-12.0228	8.67263	7.20598	2				0.002	3.45704	0.184801	18.7068	6.82568	3.60502	2
		0.002	2.90461	0.23014	12.6211	5.58962	1.06848	5				0.002	3.85607	0.181979	21.1896	8.49477	3.34757	5				0.002	3.19648	0.175443	18.2195	12.3292	3.21918	5
		0.002	-6.1938	0.238736	-25.9441	7.35193	1.21519	10				0.002	0.937069	0.215853	4.34124	5.56981	1.2112	10				0.002	-0.795926	0.162436	-4.89994	6.43078	1.98258	10
		0.002	0.433377	0.130546	3.31973	4.9047	0.719687	20				0.002	1.28145	0.197923	6.47449	4.59598	0.386195	20				0.002	0.175815	0.109774	1.60161	6.08615	0.511634	20
		0.002	0.506079	0.161773	3.12833	2.38016	0.466396	50				0.002	1.13327	0.23365	4.85029	3.28228	0.346682	50				0.002	2.81296	0.170974	16.4526	3.64131	0.604429	50
		0.002	1.8183	0.257656	7.05708	1.93004	0.230606	100				0.002	5.60833	0.194695	28.8057	3.19031	0.350147	100				0.002	-0.283176	0.141463	-2.00177	3.39164	0.381743	100
		0.002	3.54359	0.282416	12.5474	1.76829	0.147566	200				0.002	8.33781	0.216483	38.5148	2.63671	0.330004	200				0.002	-0.896322	0.244468	-3.66642	2.72467	0.190628	200
		0.002	1.88883	0.16526	11.4294							0.002	-3.28275	0.144155	-22.7724							0.002	2.35128	0.230674	10.1931
		0.002	-0.280703	0.203004	-1.38275							0.005	10.9101	0.457745	23.8344							0.005	1.28087	0.650743	1.96832
		0.002	10.8545	0.177322	61.2135							0.005	10.8664	0.63357	17.1511							0.005	-3.08458	0.495285	-6.22789
		0.002	-0.378621	0.199962	-1.89346							0.005	-0.886089	0.358338	-2.47277							0.005	4.07934	0.502703	8.11481
		0.002	9.26429	0.176822	52.3933							0.005	5.40237	0.505924	10.6782							0.005	6.92748	0.346568	19.9888
		0.002	2.43479	0.204067	11.9313							0.005	0.0692251	0.493694	0.140219							0.005	12.8261	0.413999	30.981
		0.002	0.41852	0.160372	2.60968							0.005	-2.22166	0.557913	-3.98209							0.005	7.98066	0.335681	23.7745
		0.002	-1.54401	0.197828	-7.80481							0.005	10.7155	0.541845	19.776							0.005	6.47068	0.502183	12.8851
		0.002	0.505351	0.15404	3.28065							0.005	2.72225	0.397678	6.84536							0.005	4.08353	0.454229	8.99002
		0.002	6.41156	0.189018	33.9204							0.005	1.89984	0.423832	4.48253							0.005	1.92463	0.491682	3.91438
		0.002	2.97831	0.169295	17.5924							0.01	3.91294	1.0382	3.76897							0.005	7.20527	0.610339	11.8054
		0.002	8.65368	0.234688	36.8731							0.01	7.04217	0.720713	9.77112							0.005	13.4151	0.690558	19.4265
		0.002	0.893213	0.275178	3.24595							0.01	1.87847	0.914937	2.05311							0.01	13.6655	0.749689	18.2282
		0.002	1.60233	0.198792	8.06033							0.01	5.46225	0.879825	6.20834							0.01	3.39686	0.936481	3.62726
		0.002	7.96416	0.290627	27.4034							0.01	7.45707	0.766147	9.73321							0.01	-0.11301	1.01711	-0.111109
		0.002	1.58559	0.240062	6.60492							0.01	3.43969	0.929081	3.70225							0.01	14.2055	1.02189	13.9012
		0.002	8.90324	0.23807	37.3976							0.01	1.15191	1.09225	1.05462							0.01	3.21621	0.706234	4.55403
		0.005	2.6104	0.411435	6.34462							0.01	9.12598	1.10392	8.26689							0.01	6.97723	0.985213	7.08195
		0.005	2.299	0.406573	5.65458							0.02	4.04005	1.36666	2.95615							0.01	5.20931	1.30454	3.99322
		0.005	-1.08374	0.552576	-1.96125							0.02	6.68414	1.65935	4.02817							0.01	6.46718	1.22331	5.28662
		0.005	8.30658	0.595297	13.9537							0.02	12.8785	2.06161	6.24682							0.01	1.34389	1.02151	1.31559
		0.005	2.57033	0.680825	3.77532							0.02	6.85018	1.78618	3.8351							0.02	5.6544	1.90086	2.97465
		0.005	-0.217443	0.483579	-0.449654							0.02	9.53532	2.06004	4.62871							0.02	24.9619	2.75242	9.06907
		0.005	3.59982	0.469413	7.66877							0.02	11.9837	1.88652	6.35228							0.02	3.73958	1.75535	2.13039
		0.005	5.23675	0.623526	8.39861							0.02	7.60959	1.69073	4.50077							0.02	18.4375	2.51507	7.33081
		0.005	4.00818	0.571879	7.00879							0.02	7.75225	2.14446	3.61501							0.02	10.7637	1.36215	7.90199
		0.005	8.16175	0.482443	16.9175							0.02	7.65753	1.47236	5.20085							0.02	15.6719	1.93696	8.09098
		0.005	0.481111	0.43409	1.10832							0.05	10.4462	4.00142	2.61062							0.02	18.1197	2.15776	8.39746
		0.005	0.106051	0.339362	0.312501							0.05	15.8731	4.40858	3.6005							0.02	6.83682	1.35361	5.0508
		0.005	-4.93766	0.524717	-9.41014							0.05	7.53186	3.41738	2.20399							0.02	5.09929	1.72365	2.95843
		0.005	-0.00702143	0.512163	-0.0137094							0.05	9.32951	4.08801	2.28216							0.02	10.6142	2.02494	5.24174
		0.005	3.52145	0.468716	7.51297							0.05	11.6883	4.40512	2.65334							0.02	3.38542	1.70196	1.98913
		0.005	6.64149	0.725243	9.15761							0.05	17.2263	4.59203	3.75135							0.02	22.0467	2.03033	10.8587
		0.005	4.52592	0.502126	9.01351							0.05	14.3103	3.22676	4.43488							0.02	20.419	2.38221	8.57145
		0.005	1.72712	0.393247	4.39195							0.05	22.701	4.80808	4.72143							0.02	10.6228	2.43064	4.37037
		0.005	6.84872	0.704229	9.72513							0.1	23.6687	5.95201	3.97659							0.02	7.30085	1.73032	4.21936
		0.005	2.87075	0.443748	6.46932							0.1	14.089	5.73313	2.45747							0.02	7.79705	1.49936	5.20025
		0.005	4.02655	0.639189	6.29947							0.1	18.4844	7.52027	2.45794							0.02	3.40277	1.67198	2.03517
		0.005	4.20296	0.462863	9.08035							0.1	19.9228	7.93152	2.51185							0.02	15.9907	1.5078	10.6053
		0.005	4.7434	0.543834	8.72215							0.1	26.6874	8.30182	3.21464							0.02	10.9966	2.28726	4.80776
		0.005	3.17909	0.593103	5.3601							0.1	29.0524	8.10727	3.5835							0.02	11.0143	1.5698	7.01637
		0.005	1.92642	0.40988	4.69996							0.1	18.6876	8.44418	2.21307							0.02	16.6144	1.43784	11.5551
		0.01	8.38393	1.19317	7.0266							0.1	37.0249	6.71461	5.51408							0.02	12.5251	2.05653	6.0904
		0.01	13.5189	1.2527	10.7918							0.1	20.9532	7.52717	2.78368							0.02	16.3669	1.63228	10.027
		0.01	4.55885	0.891325	5.11469							0.2	29.874	12.793	2.33518							0.02	5.47024	2.11903	2.58148
		0.01	-0.207567	1.36929	-0.151587							0.2	32.6875	13.5061	2.4202							0.02	8.84979	2.07004	4.27518
		0.01	16.5272	1.1322	14.5974							0.2	11.4744	10.177	1.12748							0.02	6.91005	1.59021	4.34537
		0.01	5.02369	0.769512	6.52841							0.2	34.1101	13.1026	2.60331							0.02	10.5199	1.66074	6.33447
		0.01	2.52899	1.0611	2.38337							0.2	30.5778	10.449	2.92639							0.02	10.5023	2.0075	5.23153
		0.01	0.609535	0.789548	0.772005							0.2	39.4038	14.9288	2.63945							0.02	11.1043	1.24855	8.89376
		0.01	4.55231	0.785618	5.79456							0.2	30.8502	12.9354	2.38494							0.02	6.80503	1.53616	4.4299
		0.01	2.1447	0.622573	3.4449							0.2	35.6339	15.0068	2.37452							0.05	15.571	4.74309	3.28288
		0.01	3.16097	0.808394	3.91018							0.2	54.4441	11.0684	4.91888							0.05	6.18635	4.17278	1.48255
		0.01	4.31469	0.921257	4.68348																	0.05	13.2999	4.38113	3.03572
		0.01	4.79559	1.241	3.86429																	0.05	29.5409	7.04198	4.19497
		0.01	15.95	1.1592	13.7595																	0.05	18.9993	5.12335	3.70837
		0.01	2.00586	0.902672	2.22214																	0.05	33.8732	5.03384	6.7291
		0.01	7.19428	0.982512	7.32233																	0.05	11.0496	3.61622	3.05557
		0.01	5.6387	0.986931	5.71337																	0.1	57.3545	7.13368	8.03996
		0.01	7.48579	0.791972	9.45209																	0.1	28.8632	8.02348	3.59734
		0.01	13.4869	0.443356	30.42																	0.1	19.468	9.82079	1.98233
		0.01	9.04221	0.877516	10.3043																	0.1	36.618	10.4125	3.51673
		0.01	7.0572	1.00737	7.00557																	0.1	14.6335	5.57278	2.62589
		0.01	3.23695	0.905096	3.57636																	0.1	22.1879	8.6868	2.55421
		0.01	11.5205	1.32089	8.72177																	0.1	39.2364	11.7085	3.3511
		0.01	6.82258	1.12086	6.08692																	0.1	16.3399	6.64211	2.46005
		0.01	9.14059	0.874383	10.4538																	0.1	38.4636	13.7842	2.79041
		0.02	6.63681	2.58753	2.56492																	0.1	27.2709	9.19718	2.96514
		0.02	3.06344	1.34438	2.2787																	0.1	33.1142	9.73292	3.40229
		0.02	7.30172	2.45094	2.97915																	0.1	45.6638	9.6953	4.70989
		0.02	7.62159	1.37338	5.54951																	0.1	33.577	8.90129	3.77215
		0.02	5.4764	1.45265	3.76994																	0.1	16.0052	8.6078	1.85938
		0.02	4.30211	1.78651	2.40811																	0.1	35.7852	11.0187	3.24768
		0.02	15.6564	2.1153	7.4015																	0.2	58.4458	17.814	3.28089
		0.02	3.60786	1.71385	2.10512																	0.2	29.4222	17.6576	1.66626
		0.02	10.5332	1.82383	5.77532																	0.2	36.474	11.3738	3.20684
		0.02	6.63821	1.53189	4.33335																	0.2	50.1169	15.1003	3.31893
		0.02	0.768543	1.20664	0.636928																	0.2	42.9082	19.5994	2.18926
		0.02	7.4099	1.25303	5.91359																	0.2	49.6413	14.3787	3.45242
		0.02	7.91242	2.25689	3.5059																	0.2	23.4057	17.8683	1.3099
		0.02	8.53681	1.672	5.10575																	0.2	44.9433	18.0775	2.48615
		0.02	6.06398	1.61224	3.76121																	0.2	39.9186	13.3134	2.99838
		0.02	12.5987	1.80004	6.99912																	0.2	41.3751	13.7725	3.00418
		0.02	2.08352	1.5017	1.38744																	0.2	34.6886	25.8453	1.34216
		0.02	3.98953	1.4445	2.76188																	0.2	60.2672	13.676	4.40679
		0.02	8.89529	2.00546	4.43554																	0.2	32.8505	11.6545	2.8187
		0.02	11.0943	1.36748	8.11295																	0.2	32.2557	13.3685	2.41281
		0.02	5.96855	1.56436	3.81533																	0.2	69.1354	20.8784	3.31134
		0.02	8.8908	1.45528	6.10934																	0.2	27.3922	17.7432	1.54381
		0.02	3.14209	1.79002	1.75534																	0.2	29.1231	19.0226	1.53097
		0.02	4.50435	2.54826	1.76762																	0.2	53.2927	21.1965	2.51422
		0.02	8.04406	1.67625	4.79884																	0.2	57.9328	22.0514	2.62717
		0.02	9.81169	1.8159	5.40321																	0.2	88.8814	17.965	4.94748
		0.02	4.46313	1.59201	2.80346																	0.2	25.2123	11.671	2.16025
		0.02	4.55561	1.48113	3.07577																	0.2	31.4216	11.7435	2.67566
		0.02	10.1391	1.71351	5.91715																	0.2	54.0134	17.4821	3.08964
		0.02	4.25825	1.49254	2.85302																	0.2	33.2023	16.2895	2.03826
		0.02	7.0105	1.89751	3.69458																	0.2	26.4078	14.4678	1.82528
		0.02	19.2083	2.26459	8.48202																	0.2	66.1249	14.118	4.68373
		0.02	6.16619	1.51936	4.05841
		0.02	4.15774	2.4337	1.7084
		0.02	34.1337	1.25202	27.2629
		0.02	7.1361	1.3399	5.32585
		0.02	19.6221	1.80737	10.8567
		0.05	6.10996	3.28333	1.8609
		0.05	7.38392	3.63302	2.03245
		0.05	4.39861	3.44237	1.27779
		0.05	3.51819	3.87622	0.907634
		0.05	3.79762	5.63	0.674533
		0.05	2.24528	3.1491	0.712991
		0.05	10.2997	4.69655	2.19304
		0.05	10.508	3.81087	2.75738
		0.05	12.1924	4.62395	2.63679
		0.05	9.02504	3.76108	2.39959
		0.05	17.1915	3.88929	4.42022
		0.05	5.70571	4.89755	1.16501
		0.05	11.1847	5.31694	2.1036
		0.05	8.16949	4.79996	1.70199
		0.05	-2.00329	2.69256	-0.744009
		0.05	7.88627	3.77018	2.09175
		0.05	11.2212	4.88724	2.29602
		0.05	-0.705256	5.4499	-0.129407
		0.05	9.41379	3.40704	2.76304
		0.05	20.356	3.5906	5.66925
		0.05	1.79777	3.21909	0.558471
		0.05	9.54964	3.85594	2.4766
		0.05	17.1879	4.20368	4.08877
		0.05	12.3499	5.62354	2.19611
		0.05	45.6634	4.00786	11.3935
		0.1	8.47542	6.77487	1.25101
		0.1	13.6366	7.51439	1.81473
		0.1	6.21037	6.56443	0.946064
		0.1	14.9306	8.63892	1.72829
		0.1	8.55021	9.08916	0.940704
		0.1	6.64161	6.41795	1.03485
		0.1	4.83898	4.84765	0.998212
		0.1	32.6474	6.30836	5.17526
		0.1	29.8898	8.76145	3.41151
		0.1	21.7097	8.38862	2.58799
		0.1	15.6664	7.17404	2.18376
		0.1	10.7039	6.03702	1.77304
		0.1	7.91902	6.48292	1.22152
		0.1	13.7544	6.36896	2.1596
		0.1	21.1794	9.66044	2.19238
		0.1	15.8718	9.34841	1.69781
		0.1	12.0529	5.96783	2.01965
		0.1	16.9464	9.97881	1.69824
		0.1	5.1454	5.50311	0.934999
		0.1	39.3041	8.4948	4.62684
		0.1	12.2852	6.03113	2.03696
		0.1	14.3772	7.26268	1.9796
		0.1	5.57848	10.6661	0.52301
		0.1	3.02857	6.26334	0.483539
		0.1	32.9856	7.07655	4.66125
		0.1	14.4448	6.91798	2.08801
		0.1	9.03904	6.91419	1.30732
		0.1	3.92321	6.94325	0.565039
		0.2	33.0915	17.7938	1.85972
		0.2	17.123	10.4346	1.64098
		0.2	14.7151	7.21634	2.03914
		0.2	33.2033	7.71171	4.30557
		0.2	3.82643	10.7591	0.355646
		0.2	18.9329	9.50065	1.9928
		0.2	21.9212	10.5709	2.07373
		0.2	17.9678	10.4423	1.72067
		0.2	15.2955	14.216	1.07594
		0.2	5.71045	10.5617	0.540675
		0.2	11.9404	8.99721	1.32712
		0.2	32.7475	8.1443	4.02091
		0.2	13.6942	11.9932	1.14183
		0.2	19.4878	6.42333	3.03391
		0.2	17.8352	12.0077	1.48531
		0.2	7.91282	9.97819	0.793012
		0.2	18.9881	8.92237	2.12815
		0.2	10.9346	13.0193	0.839876
		0.2	14.2337	8.24419	1.72651
		0.2	21.8992	7.55027	2.90045
		0.2	9.89613	10.6142	0.932348
		0.2	17.2802	12.0692	1.43176
		0.2	19.0568	11.0119	1.73056
		0.2	19.519	11.7314	1.66383
		0.2	9.02004	11.0763	0.814355
		0.2	16.0255	11.4055	1.40507
		0.2	30.0629	15.7338	1.91072
		0.2	34.7149	13.6102	2.55065
		0.2	12.6963	7.53024	1.68604
		0.2	24.5758	8.08308	3.0404
		0.2	21.4104	16.002	1.33798
		0.2	5.48194	12.3622	0.443444
		0.2	22.092	11.1353	1.98396
		0.2	11.7521	10.3722	1.13304
		0.2	34.341	13.97	2.4582
		0.2	16.8513	8.23378	2.04661
		0.2	12.094	16.4159	0.736725
		0.2	22.824	7.90511	2.88725

## Sheet: -55mV
	WT	ddur1_all_sort	dCMS1_all_sort	Qreal1_all_sort	efficiency	eff_mean	eff_sem	ddur (ms)			KO-INJ	ddur1_all_sort	dCMS1_all_sort	Qreal1_all_sort	efficiency	eff_mean	eff_sem	ddur (ms)			CaBP12-DKO	ddur1_all_sort	dCMS1_all_sort	Qreal1_all_sort	efficiency	eff_mean	eff_sem	ddur (ms)
		0.002	4.69501	0.112724	41.6505	20.0137	5.74199	2				0.002	1.13339	0.0884888	12.8083	61.215	14.4495	2				0.002	2.76727	0.01506	183.75	38.2282	25.6277	2
		0.002	-3.25968	0.209503	-15.5591	12.678	2.2947	5				0.002	8.90987	0.131295	67.8615	13.3255	4.92038	5				0.002	4.32758	0.160213	27.0114	30.6065	13.3859	5
		0.002	3.29119	0.113586	28.9753	9.59591	1.64812	10				0.002	7.36344	0.0968662	76.0166	4.68577	1.53714	10				0.002	-0.201979	0.0176857	-11.4205	29.7273	28.9314	10
		0.002	3.99915	0.137191	29.1502	4.94278	0.578569	20				0.002	10.3047	0.108984	94.5524	4.16577	1.31874	20				0.002	-4.28762	0.0353316	-121.354	-2.14086	2.84398	20
		0.002	3.10286	0.113098	27.4351	3.34052	0.860252	50				0.002	2.69521	0.131972	20.4226	2.97625	1.12785	50				0.002	0.730389	0.0242706	30.0936	-1.01459	1.60089	50
		0.002	10.1389	0.197732	51.276	2.53562	0.269427	100				0.002	7.78369	0.0672133	115.806	3.07424	0.549351	100				0.002	0.60124	0.114375	5.25674	-1.46489	0.875282	100
		0.002	1.48112	0.136978	10.8128	2.27115	0.219216	200				0.002	4.87857	0.118879	41.0381	1.83796	0.478142	200				0.002	2.47466	0.121997	20.2846	-0.942596	0.728795	200
		0.002	5.09352	0.213163	23.895							0.005	6.40577	0.222632	28.7729							0.002	5.04424	0.14736	34.2307
		0.002	1.76723	0.143244	12.3372							0.005	7.30944	0.284488	25.6933							0.002	45.2067	0.170033	265.87
		0.002	-0.247742	0.14371	-1.7239							0.005	2.98762	0.332909	8.97428							0.002	-2.12314	0.043019	-49.3535
		0.002	1.35588	0.113926	11.9014							0.005	1.41976	0.32149	4.41619							0.002	1.82362	0.118664	15.3679
		0.005	3.28636	0.533145	6.1641							0.005	7.00679	0.297949	23.5167							0.002	1.06837	0.0973986	10.969
		0.005	4.85372	0.326091	14.8846							0.005	2.08605	0.242634	8.59752							0.002	0.161176	0.0458401	3.51605
		0.005	1.91691	0.273807	7.00095							0.005	-1.32254	0.197617	-6.69244							0.002	3.04811	0.0251968	120.972
		0.005	7.72695	0.48749	15.8505							0.01	5.73958	0.651764	8.80622							0.005	3.07066	0.299671	10.2468
		0.005	2.79596	0.263376	10.6158							0.01	3.4371	0.565782	6.07495							0.005	12.0895	0.0816435	148.077
		0.005	2.64425	0.313467	8.4355							0.01	2.00616	0.525953	3.81433							0.005	0.422456	0.00359747	117.431
		0.005	9.71388	0.332887	29.1807							0.01	-1.7254	0.442058	-3.90311							0.005	1.80017	0.036752	48.9816
		0.005	2.93637	0.363994	8.06708							0.01	3.37151	0.591734	5.69768							0.005	1.32473	0.384794	3.4427
		0.005	2.84209	0.380395	7.47142							0.01	2.10435	0.37076	5.67577							0.005	6.92593	0.278984	24.8255
		0.005	5.20949	0.272621	19.1089							0.01	2.66736	0.40204	6.63456							0.005	10.672	0.421814	25.3003
		0.01	3.18127	0.685898	4.63811							0.02	5.4625	0.772951	7.06707							0.005	4.32259	0.076232	56.7031
		0.01	3.31897	0.638926	5.19461							0.02	6.19833	1.44058	4.30266							0.005	-0.143084	0.286795	-0.498907
		0.01	19.5268	0.955083	20.4451							0.02	-1.98173	1.41005	-1.40543							0.005	3.07537	0.273395	11.2488
		0.01	2.73859	0.595343	4.60002							0.02	8.39646	1.09949	7.63669							0.005	-0.239262	0.0149908	-15.9606
		0.01	15.5392	1.02942	15.0951							0.02	1.15313	1.19919	0.961591							0.005	-3.66741	0.088871	-41.2667
		0.01	5.84982	0.487449	12.0009							0.02	5.56661	0.754009	7.38268							0.005	10.5349	0.372258	28.3
		0.01	5.00829	0.665281	7.52808							0.02	4.12031	1.28153	3.21515							0.005	0.786061	0.0674118	11.6606
		0.01	4.27642	0.785549	5.44386							0.05	24.4997	3.20767	7.63785							0.01	1.79089	0.221539	8.08386
		0.01	14.6012	1.0044	14.5372							0.05	2.31014	1.70945	1.35139							0.01	2.78714	0.538143	5.17918
		0.01	2.71449	0.606499	4.47567							0.05	2.31889	3.3113	0.700296							0.01	2.20925	0.1164	18.9798
		0.01	6.06406	0.52293	11.5963							0.05	-0.692865	3.51825	-0.196935							0.01	-0.68452	0.0771578	-8.87169
		0.02	4.3664	1.40225	3.11385							0.05	4.16808	2.85186	1.46153							0.01	8.27062	0.545376	15.165
		0.02	9.39955	1.28557	7.31158							0.05	9.79645	2.75077	3.56135							0.01	2.11817	0.459646	4.60826
		0.02	11.8671	2.02578	5.85804							0.05	14.0574	2.22487	6.3183							0.01	-1.03128	0.0266992	-38.6259
		0.02	4.95706	1.36628	3.62814							0.1	12.581	3.78288	3.32577							0.01	-1.52566	0.573228	-2.66152
		0.02	15.0492	1.76028	8.54932							0.1	28.3586	5.59868	5.06523							0.01	14.1083	0.704711	20.02
		0.02	4.88713	1.38452	3.52984							0.1	11.0444	3.8125	2.89689							0.01	-2.41206	0.105563	-22.8495
		0.02	13.2601	1.93685	6.84622							0.1	11.3803	6.17586	1.84271							0.01	4.73425	0.0117834	401.773
		0.02	3.37989	1.13442	2.9794							0.1	6.55199	5.3527	1.22405							0.01	0.387283	0.0803525	4.8198
		0.02	4.97396	1.21429	4.09619							0.1	31.5663	6.52271	4.83945							0.01	4.98582	0.709589	7.02635
		0.02	5.65533	1.13914	4.96456							0.1	14.142	6.08102	2.3256							0.01	2.77229	0.784216	3.53511
		0.02	5.13812	1.47081	3.49339							0.2	28.1782	7.81547	3.60544							0.02	-9.9334	0.527502	-18.831
		0.05	7.6863	2.94717	2.60803							0.2	14.1783	12.2082	1.16138							0.02	10.5776	0.855104	12.37
		0.05	4.28471	3.03208	1.41313							0.2	22.451	10.933	2.05351							0.02	-1.16571	0.0701057	-16.6279
		0.05	3.74856	3.47717	1.07805							0.2	15.3285	10.9659	1.39783							0.02	-13.1936	0.589377	-22.3857
		0.05	11.1604	2.95225	3.7803							0.2	6.50987	6.69973	0.971662							0.02	0.638176	1.04792	0.608993
		0.05	14.4723	3.67506	3.93798																	0.02	5.24116	1.62618	3.22299
		0.05	6.99026	3.16787	2.20661																	0.02	1.32424	0.170403	7.77122
		0.05	7.4259	3.63311	2.04395																	0.02	4.79723	0.920912	5.20922
		0.05	21.6484	4.88788	4.429																	0.02	12.1334	1.18981	10.1978
		0.05	20.2924	1.95824	10.3626																	0.02	3.34945	0.612238	5.47083
		0.05	5.41891	3.506	1.54561																	0.02	-0.768551	0.0559393	-13.739
		0.1	12.4202	6.51321	1.90692																	0.02	1.47623	0.85586	1.72485
		0.1	13.9008	5.49	2.53202																	0.02	1.35048	1.04475	1.29263
		0.1	10.7243	7.28475	1.47216																	0.02	3.87467	1.03704	3.73628
		0.1	11.3899	7.24178	1.5728																	0.02	-9.33157	0.554529	-16.8279
		0.1	11.9895	5.70731	2.10073																	0.02	3.39774	1.33089	2.55298
		0.1	16.7482	6.48543	2.58243																	0.05	2.21247	2.29022	0.966051
		0.1	18.9731	5.81313	3.26384																	0.05	11.3547	2.6605	4.26788
		0.1	24.7422	6.31377	3.91877																	0.05	0.807222	0.177953	4.53615
		0.1	18.5512	9.21636	2.01286																	0.05	-0.315476	0.35632	-0.885373
		0.1	22.2112	9.32757	2.38124																	0.05	-8.78997	1.31291	-6.69503
		0.1	39.7091	9.57294	4.14806																	0.05	-8.26933	1.03926	-7.95694
		0.2	25.7942	12.9038	1.99896																	0.05	0.0931235	3.26032	0.0285627
		0.2	51.5863	17.6846	2.91702																	0.05	2.6178	2.55242	1.02561
		0.2	41.872	18.6619	2.24372																	0.05	-5.66977	1.38424	-4.09594
		0.2	27.8989	14.3817	1.93989																	0.05	1.13931	2.23606	0.509517
		0.2	14.5495	12.6526	1.14992																	0.05	28.7085	2.88049	9.96653
		0.2	20.3046	12.6186	1.6091																	0.05	-0.627899	1.08632	-0.578006
		0.2	47.0387	17.4925	2.68908																	0.05	-1.7985	2.7074	-0.66429
		0.2	22.8724	11.4833	1.9918																	0.05	-19.6442	1.34283	-14.629
		0.2	32.9151	10.3172	3.19031																	0.1	1.53479	3.0032	0.511052
		0.2	35.7276	10.1164	3.53165																	0.1	-9.88947	1.29581	-7.63188
		0.2	20.752	12.057	1.72116																	0.1	3.13225	5.86274	0.534264
																						0.1	-0.950821	1.17093	-0.812022
																						0.1	13.3418	4.74513	2.81168
																						0.1	-14.8811	2.37341	-6.26992
																						0.1	1.79634	4.63745	0.387355
																						0.1	-2.01365	3.31992	-0.606536
																						0.1	-21.9489	2.51292	-8.73442
																						0.1	-3.51855	0.508336	-6.9217
																						0.1	-4.41715	5.82563	-0.758227
																						0.1	-3.14999	4.05939	-0.775976
																						0.1	-2.39889	4.71597	-0.508674
																						0.1	13.0032	6.90053	1.88438
																						0.1	-0.641079	0.424028	-1.51188
																						0.1	6.71519	3.43994	1.95212
																						0.1	5.81248	3.75651	1.54731
																						0.2	-17.5044	9.2448	-1.89343
																						0.2	-3.84014	7.05771	-0.544106
																						0.2	-19.3548	4.82477	-4.01155
																						0.2	8.78436	11.0788	0.792898
																						0.2	3.92547	9.24791	0.424471
																						0.2	-1.9448	1.11116	-1.75024
																						0.2	-4.37897	3.88762	-1.12639
																						0.2	-1.65358	7.05626	-0.234342
																						0.2	9.03798	7.43208	1.21608
																						0.2	0.658559	1.21311	0.542868
																						0.2	-3.26274	7.89809	-0.413105
																						0.2	6.72492	4.07421	1.65061
																						0.2	-24.6894	2.18773	-11.2854
																						0.2	-0.664925	8.81886	-0.0753981
																						0.2	1.99798	1.45378	1.37433
																						0.2	0.0167147	5.59257	0.00298873
																						0.2	-5.39349	7.76701	-0.69441
