# Supplementary material for: CaBP1 and 2 enable sustained CaV1.3 calcium currents and synaptic transmission in inner hair cells
Source: eLife. 2024 Dec 24;13:RP93646. doi: 10.7554/eLife.93646 (PMC11668525; doi:10.7554/eLife.93646)
Supplement: Figure 5—source data 1. [file elife-93646-fig5-data1.xlsx]

## Sheet: IntensROI
Analysis of single immunofluorescent spots was performed using a custom written matlab script
																SpotsChan1																		SpotsChan2
fname	line	group	ChannelOrder	doFWHM	doPerCell	DoBackground	doNoSynSumROI	+/-ROI	HistXmax	HistSteps	+/-ROI FWHM	HistXmaxFWHM	HistStepsFWHM	MembraneChan	moveROI	meanIntensChan1	stdIntensChan1	meanIntensChan2	stdIntensChan2	meanSynGaussAmpX1	stdSynGaussAmpX1	meanSynGaussFWHMX1	stdSynGaussFWHMX1	meanSynGaussAmpY1	stdSynGaussAmpY1	meanSynGaussFWHMY1	stdSynGaussFWHMY1	meanSynGaussAmpZ1	stdSynGaussAmpZ1	meanSynGaussFWHMZ1	stdSynGaussFWHMZ1			meanIntensChan1	stdIntensChan1	meanIntensChan2	stdIntensChan2	meanSynGaussAmpX2	stdSynGaussAmpX2	meanSynGaussFWHMX2	stdSynGaussFWHMX2	meanSynGaussAmpY2	stdSynGaussAmpY2	meanSynGaussFWHMY2	stdSynGaussFWHMY2	meanSynGaussAmpZ2	stdSynGaussAmpZ2	meanSynGaussFWHMZ2	stdSynGaussFWHMZ2
Hom1 (Can1) RibA (Can2)
W:\public\Data\CaBP1_2\Immuno\Synapse\Analysis\190712_Hom1_RibA\190712_hom1_RibA_CTRL\190712CaBP12CTRL_chHom1488_rbRibA568.ims	3	1	1 2	1	0	0	0	3 3 2	0	10	10 10 3	0	10	0	0	12056.3	2997	2560.91	1496.63	21037.4	6554.64	0.537875	0.184365	21145.2	8272.75	0.584065	0.279742	5427.71	2683.17	0.439875	0.0670326			8480.82	3128.71	3704.38	1470.83	5766.57	2908.41	0.418913	0.253126	5753.1	3277.96	0.4062	0.246925	1976.9	1302.52	0.368752	0.13312
W:\public\Data\CaBP1_2\Immuno\Synapse\Analysis\190712_Hom1_RibA\190712_hom1_RibA_DKO\190712CaBP12DKO_chHom1488_rbRibA568.ims	4	1	1 2	1	0	0	0	3 3 2	0	10	10 10 3	0	10	0	0	18313.2	3688.04	2648.71	1121.44	41202.9	14660.6	0.758615	0.262191	41756.1	18302.1	0.675981	0.267914	10291.3	4918.79	0.452185	0.0585049			12732.7	4652.82	3693.86	1587.06	5827.55	3644.53	0.445396	0.305388	6418.62	3911.3	0.458585	0.343482	2491.36	1681.89	0.406893	0.111137
Hom1 (Can1) CtBP2 (Can2)
W:\public\Data\CaBP1_2\Immuno\Synapse\Analysis\190808_chHom1_CtBP2\190808_chHom1_CtBP2_DKO\190808CaBP12DKO.ims	6	2	1 2	1	0	0	0	3 3 2	0	10	10 10 3	0	10	0	0	24157.6	4964.36	3778.2	2178.92	72437.7	22308.9	1.00286	0.376102	78921	27172.1	0.984942	0.387624	16935.4	9356.17	0.488142	0.0747253			15427.3	7993.41	6265.83	2251.63	15104.9	8272.26	0.655814	0.452839	16043	8206.08	0.667192	0.396002	4268.41	3124.17	0.453061	0.103343
W:\public\Data\CaBP1_2\Immuno\Synapse\Analysis\190808_chHom1_CtBP2\190808_chHom1_CtBP2_WT\190808CaBP12WT.ims	7	2	1 2	1	0	0	0	3 3 2	0	10	10 10 3	0	10	0	0	14983.4	3524.97	5086.18	3760.2	29048.5	13662	0.716243	0.370673	37489.5	19185	0.756263	0.426759	7320.83	5423.47	0.472081	0.0797796			9195.3	4510.36	8606.4	3313.77	16055.2	10201.7	0.524881	0.310465	16782.5	10734.7	0.459708	0.303215	4632.83	3443.98	0.44596	0.0923455
Hom1 (Can1) RibA (Can2)
W:\public\Data\CaBP1_2\Immuno\Synapse\Analysis\191106chHom1_RibA_Myo6\191106chHom1_RibA_Myo6_ctrl1\191106CaBP12CTRL1.ims	9	3	1 2	1	0	0	0	3 3 2	0	10	10 10 3	0	10	0	0	14323.3	2812.44	5229.51	2474.71	27522.1	11165.4	0.730923	0.33047	26660.1	9326.61	0.631132	0.257817	7282.2	3715.59	0.467111	0.0669525			11035.3	3611.88	7859.13	2440.12	12870.6	6892.48	0.444137	0.222989	13343	7681.03	0.48559	0.354408	4006.13	3029.02	0.442819	0.0832785
W:\public\Data\CaBP1_2\Immuno\Synapse\Analysis\191106chHom1_RibA_Myo6\191106chHom1_RibA_Myo6_ctrl2\191106CaBP12CTRL2.ims	10	3	1 2	1	0	0	0	3 3 2	0	10	10 10 3	0	10	0	0	18504.8	3900.29	6062.77	2495.57	35563.4	14110.8	0.698887	0.363329	35325.2	16072	0.725106	0.32896	11109.9	6499.29	0.461852	0.0699689			13922.5	4211.16	8329.18	2369.82	14987.1	10143.1	0.458008	0.313713	14254.4	8617.99	0.474107	0.345532	4986.47	2686.24	0.451746	0.0709199
W:\public\Data\CaBP1_2\Immuno\Synapse\Analysis\191106chHom1_RibA_Myo6\191106chHom1_RibA_Myo6_ctrl3\191106CaBP12CTRL3.ims	11	3	1 2	1	0	0	0	3 3 2	0	10	10 10 3	0	10	0	0	15449.2	3091.15	6408.51	2425.89	30451	12977.8	0.797191	0.281724	31598.3	11935	0.786867	0.278597	10199.2	5869.7	0.471356	0.0678645			10570.7	2910.46	8189.54	2308.54	14783.3	8588.24	0.475779	0.272061	13221.5	8275.69	0.433049	0.342162	4377.29	2449.8	0.438138	0.0775985
W:\public\Data\CaBP1_2\Immuno\Synapse\Analysis\191106chHom1_RibA_Myo6\191106chHom1_RibA_Myo6_dko1\191106CaBP12DKO1.ims	12	3	1 2	1	0	0	0	3 3 2	0	10	10 10 3	0	10	0	0	25174.3	5660.25	5541.37	2445.7	68712.6	24705.3	0.86271	0.353166	61100.4	22041.4	0.817473	0.275059	20559.3	10348	0.478379	0.0650087			14927.3	6814.26	8895.14	3114.29	26470.8	15133.3	0.694405	0.42593	25073.7	17590.4	0.711391	0.485438	8478.78	6617.05	0.46181	0.0767373
W:\public\Data\CaBP1_2\Immuno\Synapse\Analysis\191106chHom1_RibA_Myo6\191106chHom1_RibA_Myo6_dko2\191106CaBP12DKO2.ims	13	3	1 2	1	0	0	0	3 3 2	0	10	10 10 3	0	10	0	0	21494.5	3906.53	3872.31	2442.23	54970.2	20098.9	0.834042	0.272054	52313	19471.8	0.969509	0.360971	16905.5	9284.5	0.48749	0.0626966			13190.3	4528.93	7090.39	2219.25	15867.4	9296.88	0.560192	0.386181	16501.5	8769.89	0.616436	0.382789	6006.4	3195.29	0.490786	0.0627286
W:\public\Data\CaBP1_2\Immuno\Synapse\Analysis\191106chHom1_RibA_Myo6\191106chHom1_RibA_Myo6_dko3\191106CaBP12DKO3.ims	14	3	1 2	1	0	0	0	3 3 2	0	10	10 10 3	0	10	0	0	17602.9	4126.71	4644.51	2552.34	56151.9	22277.3	0.984	0.32828	38849.6	12994.2	0.93408	0.316483	11040.3	5837.68	0.445075	0.0752152			13470.7	3813.01	6680.86	2854.34	15687.9	8731.76	0.604958	0.40599	13775.8	8359.2	0.592068	0.406132	4359.94	2850.61	0.456251	0.0749083
GluA3 (Can1) CtBP2 (Can2)
W:\public\Data\CaBP1_2\Immuno\Synapse\Analysis\200308CaV1.3_CtBP2_GluA3\200308CaV1.3_CtBP2_GluA3_CTRL80\CaBP12CTRL_80_ctbp2_488_Glua3_568.ims	16	4	1 2	1	0	0	0	3 3 2	0	10	10 10 3	0	10	0	0	10212.3	4103.95	16296.4	5305.22	21223.3	12965.8	0.414918	0.270275	21385.8	14587.9	0.486208	0.381863	8406	5268.88	0.461995	0.0666653			14434.4	3287.1	13332.8	4571.08	33216.5	14474.7	0.599601	0.269019	34821.8	18322.7	0.671161	0.342788	10993.7	8778.27	0.465525	0.07226
W:\public\Data\CaBP1_2\Immuno\Synapse\Analysis\200308CaV1.3_CtBP2_GluA3\200308CaV1.3_CtBP2_GluA3_CTRL88\CaBP12CTRL_88_ctbp2_488_Glua3.ims	17	4	1 2	1	0	0	0	3 3 2	0	10	10 10 3	0	10	0	0	8438.86	2696.91	10340.5	2324.68	14243.9	6240.58	0.396304	0.141183	13726.1	9242.25	0.386814	0.31575	6110.24	3603.15	0.472412	0.0763443			10149.3	2918.7	8468.24	2910.07	21236.9	6358.81	0.687309	0.203942	20691.8	6905.25	0.627619	0.284663	6494.65	3161.62	0.444785	0.0729768
W:\public\Data\CaBP1_2\Immuno\Synapse\Analysis\200308CaV1.3_CtBP2_GluA3\200308CaV1.3_CtBP2_GluA3_CTRL99\CaBP12CTRL_99_ctbp2_488_Glua3_568.ims	18	4	1 2	1	0	0	0	3 3 2	0	10	10 10 3	0	10	0	0	6118.15	2652.41	8456.09	3174.74	12274.7	8328.58	0.411928	0.310557	13665.1	7125.18	0.49442	0.334077	8061.07	5194.03	0.457	0.0609972			9187.67	2782.9	6419.46	2781.86	15614	6905.51	0.54892	0.155961	15963.9	7586.71	0.601039	0.218801	6338.19	3358.63	0.428279	0.0684341
W:\public\Data\CaBP1_2\Immuno\Synapse\Analysis\200308CaV1.3_CtBP2_GluA3\200308CaV1.3_CtBP2_GluA3_DKO2\CaBP12DKO_2_ctbp2_488_Glua3_568.ims	19	4	1 2	1	0	0	0	3 3 2	0	10	10 10 3	0	10	0	0	9427.95	4401.59	12967.1	4858.78	30974.2	16718.9	0.753341	0.381916	31529.8	20045.3	0.721071	0.507799	15009	11089	0.47657	0.0694105			12014.5	3865.95	10304.2	4099.31	39990.4	21492.4	0.802248	0.305758	46584.3	24401.6	1.02282	0.48596	16733.5	9509.02	0.455184	0.0727723
W:\public\Data\CaBP1_2\Immuno\Synapse\Analysis\200308CaV1.3_CtBP2_GluA3\200308CaV1.3_CtBP2_GluA3_DKO92\CaBP12DKO_92_ctbp2_488_Glua3_568.ims	20	4	1 2	1	0	0	0	3 3 2	0	10	10 10 3	0	10	0	0	6817.53	2377.64	11584.8	3549.75	15129.1	10307.8	0.478223	0.3833	17896.4	10181	0.476815	0.277517	8595.71	4871.63	0.475873	0.0733999			8868.59	2489.7	9067.89	3727.03	33977.1	17773.5	0.901809	0.38846	34886.4	17440.2	0.797024	0.34947	12444.3	7912.67	0.461927	0.0698794
W:\public\Data\CaBP1_2\Immuno\Synapse\Analysis\200308CaV1.3_CtBP2_GluA3\200308CaV1.3_CtBP2_GluA3_DKO94\CaBP12DKO_94_ctbp2_488_Glua3_568.ims	21	4	1 2	1	0	0	0	3 3 2	0	10	10 10 3	0	10	0	0	7264.4	2396.81	10182.8	4533.25	16751.5	13233.3	0.497287	0.438042	19094.8	12698.8	0.593514	0.489742	6679.89	4418.13	0.467139	0.0674986			9279.55	2386.94	8047.67	4431.91	28882.7	18787.5	0.768913	0.314981	27396.7	16730.9	0.717912	0.366571	9593.33	7069.41	0.461787	0.0745255
																		Postsynapse																					Presynapse
														3w+8w	Hom1		SEM		SEM	meanSynGaussFWHMY1	SEM	meanSynGaussFWHMZ1	SEM											3w+8w		mean Intensity	SEM	FWHMX2	SEM	FWHMY2	SEM	FWHMZ2	SEM
															DKO	21348.5	1353.38	0.888445	0.0413276	0.876397	0.05193	0.470254	0.00810817											DKO		7505.73	677.963	0.679217	0.0480659	0.697929	0.054777	0.455962	0.00763759
															CTRL	15063.4	929.27	0.696224	0.0384086	0.696687	0.034334	0.462455	0.0053058											CTRL		8113.64	884.211	0.519694	0.029833	0.519809	0.0327	0.435751	0.0096246
														3w	Hom1					meanSynGaussFWHMY1		meanSynGaussFWHMZ1
															DKO	20646.2		0.859842		0.849261		0.465782
															CTRL	15083.4		0.691219		0.681792		0.460048
														3W	GluA3	meanIntensChan1	SEM	meanSynGaussFWHMX1	SEM	meanSynGaussFWHMY1	SEM	meanSynGaussFWHMZ1	SEM
															DKO	7836.63	658.138	0.576284	0.0724226	0.597133	0.0575906	0.473194	0.00247734
															CTRL	8256.45	967.88	0.407717	0.00471221	0.455814	0.0282356	0.463802	0.00370671
																n.s.		p 3.4e-6		p 0.012		n.s.
														Hom1DKO/Hom1CTRL			meanIntens	meanSynGaussFWHMX1	meanSynGaussFWHMY1	meanSynGaussFWHMZ1
																	1.41724	1.27609	1.25795	1.01686
														GluA3DKO/GluA3CTRL
																	0.949152	1.41344	1.31004	1.02025
