# Supplementary material for: CaBP1 and 2 enable sustained CaV1.3 calcium currents and synaptic transmission in inner hair cells
Source: eLife. 2024 Dec 24;13:RP93646. doi: 10.7554/eLife.93646 (PMC11668525; doi:10.7554/eLife.93646)
Supplement: Figure 5—source data 2. [file elife-93646-fig5-data2.xlsx]

## Sheet: Volume_combined
Analysis was performed with Imaris, all values are given in µm3
DKO	WT
0.329913	0.615769
0.0436931	0.085069
0.103499	0.837423
1.0821	0.293952
0.145978	0.933862
0.839473	0.924144
0.736735	0.339305
0.761268	0.778864
0.178676	1.25077
0.433619	1.2264
0.436652	0.540783
0.851545	0.75694
1.1557	1.45198
0.168628	1.91444
0.324333	0.0271873
1.72014	0.262302
0.658154	2.01017
0.607727	2.31015
1.01111	1.20507
1.39614	1.24826
0.534356	1.18681
0.793711	1.28836
1.76854	1.70249
0.24664	1.45024
0.24928	1.03724
0.423146	0.71386
0.587054	0.395334
0.844634	1.07724
1.28099	0.847558
0.342089	1.90656
0.324381	1.46825
0.114931	1.73568
0.113761	0.284542
0.555244	0.205157
0.452743	1.26291
2.34912	0.324469
0.208676	0.818805
1.15878	0.398351
1.15618	1.35745
0.578921	0.170483
1.17595	0.137809
0.599912	0.655389
0.241976	0.935004
0.153584	2.84969
0.170802	2.03311
0.424612	1.08893
0.234001	1.35242
0.200089	0.889944
0.116907	0.574585
0.324053	1.38472
1.25671	0.655375
0.158341	1.15774
0.429959	0.0175111
0.12071	2.64392
0.737124	0.956055
0.126761	0.506953
0.44482	0.819938
0.11709	0.635004
1.26947	0.462785
0.220325	2.08613
0.335707	0.637631
0.451412	0.46331
1.50862	1.47239
0.252116	1.70814
0.0593284	1.02625
0.241533	2.48697
0.484343	0.70614
0.0930637	1.09863
0.530463	0.247516
0.498878	0.430335
0.542707	1.85831
0.345906	0.516358
0.219382	0.482967
0.31098	0.645355
0.633663	1.32771
1.69466	0.0765446
0.59462	0.855597
0.957376	0.281085
0.483493	1.46263
0.573568	1.44066
0.224815	0.366672
0.0345784	1.6135
0.60429	1.19101
0.0399314	1.27523
0.458765	0.821393
0.0698597	1.08684
0.279588	1.71133
0.504421	1.69884
0.493808	1.77975
0.046282	1.16273
0.0277718	0.782056
0.0160008	2.18072
0.364105	0.619963
0.578173	0.0724824
0.276975	1.50251
0.0828745	1.42071
0.278414	1.10213
0.180994	0.490256
1.37021	0.320328
0.776821	0.681557
0.250387	2.09239
0.699766	0.967185
0.475365	0.516831
0.477233	0.0199042
0.615904	0.706285
0.384736	2.7678
0.26104	0.575917
0.36044	1.77643
1.32733	0.103815
0.192258	3.53511
0.0973645	0.788133
0.17414	0.296522
0.138687	0.706272
0.447025	0.846177
0.686224	0.614176
0.99452	0.585374
0.646993	0.171295
0.201082	1.72937
0.209651	0.0574272
0.218181	0.433509
1.0049	2.11709
0.207804	2.45097
1.16564	1.12561
0.232289	1.22837
0.340906	0.945296
1.04786	0.0776214
0.93325	1.12096
1.65753	1.32174
1.00321	2.26564
0.977226	1.05571
1.7512	2.24805
0.966198	1.5293
1.56332	1.36019
1.26658	1.49484
1.38303	1.18532
1.23947	0.534699
0.099654	0.306146
1.22975	1.4112
0.953522	1.71843
0.631953	2.02188
0.779035	0.20533
0.208435	0.259113
0.794334	1.00916
1.51427	0.168858
0.17327	1.59977
0.259121	0.828006
0.190443	0.0848939
0.10608	0.545081
0.855058	2.11908
0.0214455	0.961435
0.376593	0.645833
1.70586	1.13739
1.11042	2.8896
0.478531	0.589845
0.22459	0.0653852
0.0242378	1.34084
0.127939	0.544595
0.255945	0.357689
0.825034	0.554751
0.12772	0.452304
0.0520892	1.05212
2.20124	0.482611
1.5694	1.00095
0.287337	0.320331
1.40329	0.179474
0.574799	0.275435
0.421049	0.0781176
1.47381	0.700692
0.274058	0.926302
1.04013	0.0136744
0.394233	0.275751
0.230933	0.45017
1.92033	1.0687
0.431194	0.932337
1.91853	0.52714
1.1635	0.805453
1.6266	0.850017
1.34243	0.965643
0.481674	0.352959
0.0937701	0.611867
1.21196	0.0493399
0.308621	1.46823
0.108305	0.330441
0.140714	0.893123
0.407099	0.0237589
0.140167	0.0796286
0.626707	0.235679
0.789018	0.170511
0.114904	0.115314
0.54465	1.03984
0.12586	1.32662
0.557222	0.208587
0.0950267	1.05478
0.0959476	0.38752
0.492547	1.16533
0.503658	1.03624
0.405183	1.01609
1.53298	0.0738998
0.116946	0.110554
0.0157084	0.189137
0.548448	0.646721
0.365649	0.751522
1.68979	0.659016
0.185674	0.354321
0.33742	1.06145
0.83301	1.03294
0.0739977	0.539853
0.290176	1.13653
0.4009	0.381528
0.398259	1.54076
0.196124	1.36102
0.818323	0.00587983
1.07802	1.51892
1.379	1.37875
0.768562	1.15104
0.542228	1.26183
0.187345	0.439957
0.34513	3.74746
0.432554	0.129597
0.507268	0.117604
0.0656867	0.0295836
0.417391	0.0585622
0.490037	2.54231
0.267125	0.453363
0.0932231	1.09853
1.36494	0.757071
0.0114211	0.0393133
1.02266	0.00915452
0.616586	1.47312
0.114109	0.195465
0.867786	0.66777
0.0892572	0.175103
0.633507	1.37249
0.162058	0.185616
0.238327	0.294157
0.0261801	0.110793
0.133174	0.37632
0.404168	1.00732
0.0450136	0.484487
0.0182221	1.69076
0.0730538	1.37599
0.0140347	1.32691
0.264619	0.0244821
0.242458	0.0375641
0.616377	0.600905
0.426722	1.30696
0.192927	2.48322
0.701801	1.65611
0.264909	0.546051
0.36385	1.67734
0.497811	0.298547
0.76643	1.48201
1.48875	1.00334
0.671066	1.64739
0.186652	1.49841
1.16752	2.8387
0.649663	0.186215
0.495449	1.0074
0.514526	0.151757
0.160185	1.17626
1.17519	1.37315
0.464013	0.708356
0.204751	1.01386
0.612413	0.0181482
0.397736	0.690304
0.512511	2.00675
0.484371	0.530317
0.359207	1.09966
0.270722	0.0147372
0.0656854	0.415414
0.536305	0.121967
0.984536	1.55811
0.538962	1.91342
0.204303	0.154167
0.528073	0.285379
0.192162	0.717219
0.692291	0.393796
0.673866	2.26254
0.0481049	0.482102
0.334653	0.0681733
0.533011	2.30616
0.251332	0.0727415
1.23342	0.0101226
0.620456	1.01974
1.41231	1.34279
0.130626	0.705397
1.64092	0.402021
0.325767	0.472241
0.266371	0.982602
0.0736248	1.05148
0.443515	0.0208856
0.289548	0.910362
0.247765	0.872142
0.12585	0.0293085
0.0958567	1.63218
1.07225	0.495472
0.768321	0.0344507
0.168546	0.714452
0.241804	1.34395
0.0924161	0.42329
1.42754	0.0452191
1.35801	0.0145781
1.59831	0.863978
0.187074	1.52655
1.35119	0.14183
0.716857	0.679672
1.22827	0.732147
0.270216	0.0339534
1.28055	1.54218
0.0521627	0.562343
1.10498	0.0726496
0.798475	0.331626
0.440637	0.266647
1.98048	0.576259
0.508628	0.530801
0.206021	0.233532
0.546361	0.670346
0.224168	0.449254
0.96518	0.810268
0.656529	0.636891
0.438236	0.0387879
0.732694	0.376877
0.150297	0.563611
0.258028	0.0376775
0.483738	0.470848
1.25792	0.292483
0.990034	0.40837
1.73797	0.232015
1.53087	0.644298
0.181643	0.0355159
0.228144	0.673762
0.238551	0.934079
0.227053	0.0152653
0.446094	0.950868
0.187144	0.172397
0.0466205	0.125673
0.45998	0.830632
0.0215628	0.786961
0.2745	0.0536916
0.119955	0.0186762
0.0105835	0.0659505
0.400947	0.0694755
0.10795	0.00998855
0.950961	0.3877
0.607078	0.158934
0.175134	0.0186302
0.455819	0.393011
0.790176	0.0638251
0.0113775	0.704699
0.0826165	0.359381
0.0176843	0.115279
0.922677	0.0658452
0.200653	0.0734861
0.314927	0.591371
0.131415	0.19076
0.367977	0.120704
0.445662	0.0854442
0.160145	0.994118
0.0188417	0.0254896
1.42326	0.830159
0.0655184	0.229059
0.763621	0.205722
0.566717	0.262065
0.0544257	0.423506
0.0468445	0.506869
0.0216195	0.0202029
0.0558485	0.986123
0.0610689	0.0540916
1.21701	0.0973613
0.511329	0.0418413
0.0357972	0.401455
0.236378	0.0426046
0.28821	0.562437
0.036661	0.895295
0.474501	0.564509
0.0115141	0.609244
0.044833	0.298343
0.357537	0.290631
0.033105	0.649398
0.117414	0.256678
0.719458	0.427001
0.13489	0.765022
0.0175909	0.0468381
0.928178	0.271918
0.0801784	1.60987
0.199875	0.736808
0.200562	0.372686
0.188933	0.216006
0.0311639	0.777719
0.0319203	1.35354
0.0787625	0.592235
0.125852	1.38361
0.076629	0.66882
0.094065	1.73152
0.0285589	0.769409
0.0482238	1.04876
0.10013	0.851781
0.115536	0.936142
0.134646	0.788029
0.468424	0.760003
0.637801	0.0283522
0.86351	0.408353
0.901693	0.698144
0.328456	0.846331
0.282235	0.677156
0.089472	0.826066
0.183003	0.557982
0.083443	0.0120622
0.0649966	1.22868
0.00582847	0.281998
0.43418	0.0623432
0.792618	0.126121
1.19142	0.187874
0.0335711	1.66444
0.697086	0.753344
0.0527123	0.698085
0.449268	0.582514
0.529482	0.439651
0.428254	0.117952
0.336144	0.596081
0.694159	1.44674
0.481474	1.10685
0.0547024	0.395111
0.496854	0.0224846
0.34102	0.417239
0.482894	0.38127
0.789756	0.129034
0.578582	0.428667
0.0729702	1.13944
0.435467	0.161828
0.413908	0.0805569
0.0202463	0.185267
0.148435	0.251648
1.64663	0.0274654
0.677977	0.501505
0.128654	0.579059
0.12948	0.234534
0.0826396	1.01597
0.950008	0.251892
0.499578	0.00786464
0.301016	0.0325843
0.500109	0.356742
0.305617	1.02637
0.231071	0.147538
0.801727	0.213895
0.0711594	1.08375
1.09843	0.869848
0.149845	0.0737138
0.223573	0.249123
0.0464701	0.259455
0.368949	0.586904
0.153893	1.48088
0.243057	0.516704
0.0618295	0.791755
0.422322	0.334735
0.290908	0.80578
0.613771	0.100596
0.0961507	0.156199
0.784364	0.0349819
0.0818184	0.0310094
0.850436	0.625678
1.08382	0.622
0.191868	0.29155
0.424144	0.441978
0.243595	0.56132
0.183962	0.768437
0.395076	0.151456
0.3899	0.128166
0.134348	0.738021
0.250726	1.80926
0.907502	0.28384
0.0466423	0.458057
0.0448364	1.49892
0.253302	0.998196
0.206551	0.484641
1.01185	0.602172
0.228326	0.557661
0.261178	0.360659
0.386687	0.547451
0.209954	0.608537
0.163112	0.578934
0.159647	0.741688
0.0829549	1.27053
0.110414	0.732541
0.120168	0.318613
0.333553	0.171439
0.345324	1.00263
0.765749	0.103286
0.765165	0.808221
0.45142	0.51468
0.415177	0.755938
0.152199	0.214285
1.076	0.957768
	0.0485425
	1.31411
	0.537238
	1.2068
	0.438752
	0.00728638
	0.793441
	1.55086
	0.230145
	0.795316
	0.0389426
	0.618113
	1.31153
	0.400519
	0.294
	0.237481
	0.433936
	1.65533
	0.217925
	0.477578
	0.797429
	0.662867
	0.205264
	0.0291961
	0.025138
	0.150536
	0.022974
	0.442171
	0.459521
	1.91598
	0.0474447
	0.628903
	0.562597
	1.54324
	0.655141
	1.29845
	0.0102345
	0.0810713
	0.44915
	0.477249
	0.423484
	0.178687
	0.0270581
	0.532028
	0.106524
	0.205378
	0.425961
	0.0725458
	1.36179
	0.622746
	0.171014
	0.966157
	1.09825
	0.375628
	0.142311
	0.518111
	0.250822
	0.711514
	0.559371
	0.011452
	1.38618
	0.50363
	0.05428
	0.863564
	0.169843
	0.29844
	0.319283
	0.879914
	0.0401679
	0.366706
	0.803379
	1.93784
	0.762944
	0.517716
	0.20021
	0.442954
	0.081968
	0.0772109
	1.15095
	1.95119
	1.37784
	0.311836
	0.900402
	0.569958
	1.71204
	0.565494
	1.5387
	1.11929
	1.29018
	2.43071
	0.100471
	0.238747
	0.147054
	0.940756
	0.844364
	0.239555
	0.293366
	0.369648
	0.427721
	1.14004
	1.43234
	2.1946
	0.8536
	1.30662
	0.862775
	1.4656
	0.0212409
	0.00800774
	1.29689
	1.13378
	1.4585
	0.843039
	1.26005
	1.1179
	0.478207
	0.122761
	0.0288038
	1.15334
	0.15046
	0.00813446
	2.12179
	0.367659
	0.0183615
	0.0206876
	0.531524
	0.957226
	1.26784
	0.0834382
	0.0900488
	0.623747
	0.298037
	1.07684
	1.13829
	0.281185
	0.913153
	1.16889
	3.27463
	0.438046
	0.875034
	0.913079
	0.318995
	0.933675
	0.497172
	1.02019
	0.341861
	0.0741683
	0.0446903
	0.145225
	0.912461
	0.53114
	0.304572
	1.03546
	0.923182
	0.266112
	0.025142
	0.189205
	0.124685
	0.0441969
	1.15284
	0.503492
	0.836818
	0.258272
	0.891133
	0.183642
	1.25474
	0.0992624
	0.882601
	0.052948
	0.900444
	0.239534
	0.35555
	0.219002
	0.715744
	0.64734
	0.397159
	0.442518
	0.764672
	0.831953
	0.582547
	0.712438
	0.145987
	0.779866
	0.222825
	1.52945
	0.0108398
	0.794553
	0.121989
	0.427249
	1.06567
	0.207246
	1.21563
	0.289867
	0.877461
	1.31319
	1.0626
	1.0815
	1.33976
	0.365593
	1.2157
	2.75244
	0.149573
	0.681998
	0.437697
	0.662562
	1.37544
	1.0133
	0.335604
	0.4283
	0.193339
	0.679276
	0.0645578
	0.803237
	2.27774
	0.644352
	0.407231
	1.28086
	0.846275
	0.615921
	0.88311
	0.504645
	0.420645
	0.126954
	0.271701
	1.86699
	1.53434
	0.343232
	0.590339
	0.111238
	1.43986
	0.515374
	0.143902
	0.0727853
	0.605326
	0.738864
	0.957345
	0.168985
	0.95154
	1.12175
	0.822356
	0.57071
	0.0742911
	0.659469
	0.83932
	0.0482581
	0.685831
	0.397962
	0.67621
	0.606874
	1.6662
	0.204262
	0.418097
	0.105539
	0.451637
	0.345289
	0.563152
	0.161496
	1.12963
	0.347967
	0.903131
	0.506988
	1.33788
	0.336846
	1.09257
	0.57404
	0.396271
	1.08289
	0.514516
	0.235105
	0.110134
	0.274356
	0.45094
	0.494977
	0.193092
	0.717348
	0.473968
	0.17024
	0.603492
	0.914582
	0.307289
	0.149039
	0.224757
	0.337937
	1.01148
	0.798695
	0.216998
	0.240361
	0.149452
	0.418141
	0.115775
	0.341678
	0.385417
	0.440711
	0.0755488
	0.490045
	0.324
	2.1872
	0.933507
	0.47347
	1.53839
	0.931653
	0.093594
	0.50155
	0.50829
	0.747246
	0.337717
	0.590882
	0.265179
	0.195214
	0.104806
	0.748499
	0.426025
	1.16694
	0.385457
	1.04024
	0.218548
	0.364162
	0.0848961
	0.207149
	0.587143
	0.253746
	0.619595
	0.318998
	0.203036
	0.846573
	0.336403
	1.48274
	0.253926
	0.566184
	1.02021
	1.17544
	0.332381
	0.289469
	0.880739
	0.934122
	0.497785
	0.291448
	0.472417
	0.639035
	0.142845
	0.420624
	0.345797
	1.21631
	0.131654
	0.841343
	1.45515
	0.0854218
	0.276599
	0.797962
	0.350601
	1.31874
	3.54617
	1.22385
	0.320111
	1.50912
	0.821815
	0.343544
	0.65651
	0.289563
	1.08055
	0.605016
	0.955796
	0.774686
	0.332029
	0.525902
	0.627325
	1.49926
	0.509369
	0.304239
	0.202058
	1.28251
	0.836961
	0.368121
	0.506817
	0.433408
	1.57756
	0.613231
	1.22118
	0.656549
	0.574049
	0.230198
	0.0746165
	0.278956
	1.11932
	0.363832
	0.821733
	0.332888
	1.36977
	0.309969
	0.639325
	1.1276
	0.149989
	0.0458721
	0.190284
	0.276406
	0.743723
	0.766002
	1.60643
	1.21167
	1.7491
	0.278221
	0.414914
	0.38565
	0.261707
	0.734228
	0.574281
	0.131681
