# Supplementary material for: CaBP1 and 2 enable sustained CaV1.3 calcium currents and synaptic transmission in inner hair cells
Source: eLife. 2024 Dec 24;13:RP93646. doi: 10.7554/eLife.93646 (PMC11668525; doi:10.7554/eLife.93646)
Supplement: Figure 6—figure supplement 1—source data 1. [file elife-93646-fig6-figsupp1-data1.xlsx]

## Sheet: explanations
each following sheet has analyzed DPOAE data from individual mice in two groups called red (mutant) and black (wildtype)
DP sheets are the amplitude of the DPOAE. In Columns X (red) and Y (black), the thresholds are added.
Noise sheets are the amplitude of the noise floor
NoiseSTD are the standard deviation of the noise floor, not used in our final graphs.
the number behind is the F1 frequency at which the recordings were done.
line 1	line 1 has the stimulus intensities
line 2	mean has the average value of the nonzero values below
line 3	std has the SEM value of the nonzero values below
line 4	n is the number of nonzero values below
line 5	SEM is the SEM from the nonzero values below
lines 6 and below contain the data from individual animals along with the file name in which the original data was saved on our server (contact Nicola.Strenzke@med.uni-goettingen.de in case you need that original data, these are quite large amounts of data)
zero values indicate files in which no corresponding frequency/intensity combinations were applied, these were not included in the analysis above.

## Sheet: DP-4.7222
DPOAE	20	30	40	50	60	70		Mean	SEM	red		DPOAE	20	30	40	50	60	70		Mean	SEM	black	F1 Threshold (usually, F2, 10dB less, is shown	-18
Mean	-21.9759	-21.853	-21.9505	-23.6121	-20.717	-9.74402		-21.9759	0.785826			Mean	-20.0409	-23.7593	-22.7929	-21.2272	-16.1028	-12.5777		-20.0409	1.05312		61.8228	52.6358
Std	1.57165	1.26186	1.27694	2.22739	4.20674	8.19353		-21.853	0.476938			Std	2.35485	0.747084	1.00103	1.72271	6.98512	8.17536		-23.7593	0.334106		9.3336	18.701
n	5	8	10	10	10	10		-21.9505	0.425646			n	5	5	5	6	6	6		-22.7929	0.447675		10	6
SEM	0.785826	0.476938	0.425646	0.742462	1.40225	2.73118		-23.6121	0.742462			SEM	1.05312	0.334106	0.447675	0.703295	2.85166	3.33758		-21.2272	0.703295		2.81418	7.63466
z:\archiv\systems\2020\02\DO\CaBP1_2_DKO\non_inj\16961\DPOAE\10-33-11-DPOAEdpSPL.xls	-20.9433	-20.9271	-21.3363	-24.4724	-13.3366	-7.53873		-20.717	1.40225			Z:\archiv\systems\2020\02\DO\16235_84\DPOAE\12-49-22-DPOAEdpSPL.xls	-22.3067	-24.1572	-22.8243	-19.2052	-10.4386	-6.05433		-16.1028	2.85166		55.8123	51.3748
z:\archiv\systems\2020\02\DO\CaBP1_2_DKO\non_inj\16961\DPOAE\10-39-1-DPOAEdpSPL.xls	0	0	0	0	0	0		-9.74402	2.73118			Z:\archiv\systems\2020\02\DO\16235_84\DPOAE\12-56-35-DPOAEdpSPL.xls	0	0	0	0	0	0		-12.5777	3.33758		0	0
z:\archiv\systems\2020\02\DO\CaBP1_2_DKO\non_inj\16962\DPOAE\17-50-35-DPOAEdpSPL.xls	0	-20.565	-21.0391	-19.5743	-13.8505	-5.28133						Z:\archiv\systems\2020\02\DO\16236_85\DPOAE\12-48-1-DPOAEdpSPL.xls	-19.0393	-24.1512	-22.2495	-19.5274	-26.9598	-10.5327					52.7505	65.4543
z:\archiv\systems\2020\02\DO\CaBP1_2_DKO\non_inj\16962\DPOAE\17-55-42-DPOAEdpSPL.xls	0	0	0	0	0	0						Z:\archiv\systems\2020\02\DO\16236_85\DPOAE\12-54-13-DPOAEdpSPL.xls	0	0	0	0	0	0					0	0
z:\archiv\systems\2020\03\ST\CABP1_2_DKO\non_inj\24890\DPOAE\13-31-50-DPOAEdpSPL.xls	-22.1004	-20.4569	-23.0265	-21.4232	-25.1301	-2.42875						Z:\archiv\systems\2020\02\DO\16237_86\DPOAE\17-15-1-DPOAEdpSPL.xls	0	0	0	0	0	0					63.1408	0
z:\archiv\systems\2020\03\ST\CABP1_2_DKO\non_inj\24890\DPOAE\13-37-60-DPOAEdpSPL.xls	0	0	0	0	0	0						Z:\archiv\systems\2020\02\DO\16237_86\DPOAE\17-9-9-DPOAEdpSPL.xls	-22.8202	-22.8307	-24.307	-22.9335	-21.9114	-22.2321					0	73.8503
z:\archiv\systems\2020\03\ST\CABP1_2_DKO\non_inj\24891\DPOAE\16-10-26-DPOAEdpSPL.xls	-20.8494	-20.9641	-19.7259	-23.3993	-22.0488	-17.5137						Z:\archiv\systems\2020\02\DO\16238_87\DPOAE\13-49-51-DPOAEdpSPL.xls	-18.2877	-24.5529	-21.6146	-22.0761	-11.2208	-4.399					68.9278	53.7549
z:\archiv\systems\2020\03\ST\CABP1_2_DKO\non_inj\24891\DPOAE\16-16-28-DPOAEdpSPL.xls	0	0	0	0	0	0						Z:\archiv\systems\2020\02\DO\16238_87\DPOAE\13-54-6-DPOAEdpSPL.xls	0	0	0	0	0	0					0	0
z:\archiv\systems\2020\03\ST\CABP1_2_DKO\non_inj\24892\DPOAE\13-51-56-DPOAEdpSPL.xls	-21.3408	-22.9855	-20.5719	-26.0623	-23.4424	-21.879						Z:\archiv\systems\2020\02\DO\16238_87\DPOAE\13-58-29-DPOAEdpSPL.xls	0	0	0	0	0	0					73.5302	0
z:\archiv\systems\2020\03\ST\CABP1_2_DKO\non_inj\24892\DPOAE\14-0-31-DPOAEdpSPL.xls	0	0	0	0	0	0						Z:\archiv\systems\2020\02\DO\16242_91\DPOAE\11-36-34-DPOAEdpSPL.xls	-17.7504	-23.1046	-22.969	-23.1424	-16.0185	-8.97577					0	55	crosses 18 early, but does not grow, so determined higher
z:\archiv\systems\2020\03\ST\CABP1_2_DKO\non_inj\24893\DPOAE\16-27-56-DPOAEdpSPL.xls	-24.6454	-23.7065	-23.4566	-26.9183	-22.3464	-23.6549						Z:\archiv\systems\2020\02\DO\16242_91\DPOAE\11-42-22-DPOAEdpSPL.xls	0	0	0	0	0	0					75.1375	0
z:\archiv\systems\2020\03\ST\CABP1_2_DKO\non_inj\24893\DPOAE\16-34-6-DPOAEdpSPL.xls	0	0	0	0	0	0						Z:\archiv\systems\2021\02\DO\84357_11\DPOAE\12-42-39-DPOAEdpSPL.xls	0	0	0	0	0	0					0	0
z:\archiv\systems\2020\07\DO\CaBP1_2_DKO\non_inj\51487\Dpoae\9-37-32-DPOAEdpSPL.xls	0	-22.4894	-22.3267	-22.0913	-20.28	-6.33642						Z:\archiv\systems\2021\02\DO\84357_11\DPOAE\12-48-5-DPOAEdpSPL.xls	0	0	0	0	0	0					61.6352	0
z:\archiv\systems\2020\07\DO\CaBP1_2_DKO\non_inj\51487\Dpoae\9-43-30-DPOAEdpSPL.xls	0	0	0	0	0	0						Z:\archiv\systems\2021\02\DO\84358_12\dpoae\10-22-54-DPOAEdpSPL.xls	0	0	0	0	0	0					0	0
z:\archiv\systems\2020\07\DO\CaBP1_2_DKO\non_inj\51488\Dpoae\11-13-42-DPOAEdpSPL.xls	0	0	0	0	0	0						Z:\archiv\systems\2021\02\DO\84358_12\dpoae\10-26-60-DPOAEdpSPL.xls	0	0	0	-20.4784	-10.0678	-23.2723					0	52.3806
z:\archiv\systems\2020\07\DO\CaBP1_2_DKO\non_inj\51488\Dpoae\11-7-41-DPOAEdpSPL.xls	0	0	-23.5521	-22.6659	-25.3495	-1.78426																	63.1188
z:\archiv\systems\2021\02\DO\CaBP1_2_DKO\non_inj\85433\DPOAE\15-40-38-DPOAEdpSPL.xls	0	0	0	0	0	0																	0
z:\archiv\systems\2021\02\DO\CaBP1_2_DKO\non_inj\85433\DPOAE\15-45-53-DPOAEdpSPL.xls	0	0	-22.637	-24.8169	-22.2204	-8.15507																	63.0006
z:\archiv\systems\2021\02\DO\CaBP1_2_DKO\non_inj\85434\DPOAE\15-21-39-DPOAEdpSPL.xls	0	0	0	0	0	0																	0
z:\archiv\systems\2021\02\DO\CaBP1_2_DKO\non_inj\85434\DPOAE\15-25-56-DPOAEdpSPL.xls	0	0	0	-24.6967	-19.1653	-2.86799																	60.715
z:\archiv\systems\2021\02\DO\CaBP1_2_DKO\non_inj\85434\DPOAE\15-28-6-DPOAEdpSPL.xls	0	-22.729	-21.8329	0	0	0

## Sheet: Noise-4.7222
DPOAE	20	30	40	50	60	70		Mean	SEM	red		DPOAE	20	30	40	50	60	70		Mean	SEM	black
Mean	-20.8949	-21.3556	-21.5964	-21.5412	-21.3501	-19.6152		-20.8949	0.760326			Mean	-21.6602	-20.8124	-21.5214	-21.3421	-19.8887	-19.7104		-21.6602	0.751345
Std	1.52065	1.64596	2.24623	1.70459	2.02654	1.6355		-21.3556	0.622115			Std	1.68006	1.3443	2.29247	0.856931	2.00894	2.13472		-20.8124	0.601191
n	5	8	10	10	10	10		-21.5964	0.748745			n	5	5	5	6	6	6		-21.5214	1.02522
SEM	0.760326	0.622115	0.748745	0.568198	0.675512	0.545165		-21.5412	0.568198			SEM	0.751345	0.601191	1.02522	0.349841	0.820146	0.871495		-21.3421	0.349841
z:\archiv\systems\2020\02\DO\CaBP1_2_DKO\non_inj\16961\DPOAE\10-33-11-DPOAEdpSPL.xls	-22.2893	-20.7991	-18.716	-19.7597	-23.0293	-19.8776		-21.3501	0.675512			Z:\archiv\systems\2020\02\DO\16235_84\DPOAE\12-49-22-DPOAEdpSPL.xls	-23.1192	-20.4628	-25.175	-22.4441	-18.9691	-18.0727		-19.8887	0.820146
z:\archiv\systems\2020\02\DO\CaBP1_2_DKO\non_inj\16961\DPOAE\10-39-1-DPOAEdpSPL.xls	0	0	0	0	0	0		-19.6152	0.545165			Z:\archiv\systems\2020\02\DO\16235_84\DPOAE\12-56-35-DPOAEdpSPL.xls	0	0	0	0	0	0		-19.7104	0.871495
z:\archiv\systems\2020\02\DO\CaBP1_2_DKO\non_inj\16962\DPOAE\17-50-35-DPOAEdpSPL.xls	0	-18.5916	-18.5263	-19.0121	-18.1054	-18.4541						Z:\archiv\systems\2020\02\DO\16236_85\DPOAE\12-48-1-DPOAEdpSPL.xls	-23.7611	-21.6908	-21.7031	-19.858	-19.2913	-19.8483
z:\archiv\systems\2020\02\DO\CaBP1_2_DKO\non_inj\16962\DPOAE\17-55-42-DPOAEdpSPL.xls	0	0	0	0	0	0						Z:\archiv\systems\2020\02\DO\16236_85\DPOAE\12-54-13-DPOAEdpSPL.xls	0	0	0	0	0	0
z:\archiv\systems\2020\03\ST\CABP1_2_DKO\non_inj\24890\DPOAE\13-31-50-DPOAEdpSPL.xls	-20.2277	-23.2053	-21.9343	-21.8051	-19.1968	-19.3861						Z:\archiv\systems\2020\02\DO\16237_86\DPOAE\17-15-1-DPOAEdpSPL.xls	0	0	0	0	0	0
z:\archiv\systems\2020\03\ST\CABP1_2_DKO\non_inj\24890\DPOAE\13-37-60-DPOAEdpSPL.xls	0	0	0	0	0	0						Z:\archiv\systems\2020\02\DO\16237_86\DPOAE\17-9-9-DPOAEdpSPL.xls	-20.2703	-22.3696	-20.7588	-21.8417	-21.6272	-22.4752
z:\archiv\systems\2020\03\ST\CABP1_2_DKO\non_inj\24891\DPOAE\16-10-26-DPOAEdpSPL.xls	-20.0332	-21.7766	-20.5331	-21.4538	-24.3944	-19.0836						Z:\archiv\systems\2020\02\DO\16238_87\DPOAE\13-49-51-DPOAEdpSPL.xls	-20.0949	-20.7007	-18.9038	-21.3007	-17.0218	-19.157
z:\archiv\systems\2020\03\ST\CABP1_2_DKO\non_inj\24891\DPOAE\16-16-28-DPOAEdpSPL.xls	0	0	0	0	0	0						Z:\archiv\systems\2020\02\DO\16238_87\DPOAE\13-54-6-DPOAEdpSPL.xls	0	0	0	0	0	0
z:\archiv\systems\2020\03\ST\CABP1_2_DKO\non_inj\24892\DPOAE\13-51-56-DPOAEdpSPL.xls	-19.2146	-23.9055	-22.2343	-23.6148	-21.4946	-22.0028						Z:\archiv\systems\2020\02\DO\16238_87\DPOAE\13-58-29-DPOAEdpSPL.xls	0	0	0	0	0	0
z:\archiv\systems\2020\03\ST\CABP1_2_DKO\non_inj\24892\DPOAE\14-0-31-DPOAEdpSPL.xls	0	0	0	0	0	0						Z:\archiv\systems\2020\02\DO\16242_91\DPOAE\11-36-34-DPOAEdpSPL.xls	-21.0554	-18.8382	-21.0664	-21.2863	-19.7562	-21.7919
z:\archiv\systems\2020\03\ST\CABP1_2_DKO\non_inj\24893\DPOAE\16-27-56-DPOAEdpSPL.xls	-22.7098	-21.164	-23.575	-23.5624	-21.9428	-22.0069						Z:\archiv\systems\2020\02\DO\16242_91\DPOAE\11-42-22-DPOAEdpSPL.xls	0	0	0	0	0	0
z:\archiv\systems\2020\03\ST\CABP1_2_DKO\non_inj\24893\DPOAE\16-34-6-DPOAEdpSPL.xls	0	0	0	0	0	0						Z:\archiv\systems\2021\02\DO\84357_11\DPOAE\12-42-39-DPOAEdpSPL.xls	0	0	0	0	0	0
z:\archiv\systems\2020\07\DO\CaBP1_2_DKO\non_inj\51487\Dpoae\9-37-32-DPOAEdpSPL.xls	0	-20.5987	-24.3374	-19.6095	-23.4803	-20.6565						Z:\archiv\systems\2021\02\DO\84357_11\DPOAE\12-48-5-DPOAEdpSPL.xls	0	0	0	0	0	0
z:\archiv\systems\2020\07\DO\CaBP1_2_DKO\non_inj\51487\Dpoae\9-43-30-DPOAEdpSPL.xls	0	0	0	0	0	0						Z:\archiv\systems\2021\02\DO\84358_12\dpoae\10-22-54-DPOAEdpSPL.xls	0	0	0	0	0	0
z:\archiv\systems\2020\07\DO\CaBP1_2_DKO\non_inj\51488\Dpoae\11-13-42-DPOAEdpSPL.xls	0	0	0	0	0	0						Z:\archiv\systems\2021\02\DO\84358_12\dpoae\10-26-60-DPOAEdpSPL.xls	0	0	0	-21.3218	-22.6667	-16.9173
z:\archiv\systems\2020\07\DO\CaBP1_2_DKO\non_inj\51488\Dpoae\11-7-41-DPOAEdpSPL.xls	0	0	-24.5714	-22.5294	-21.9288	-17.4144
z:\archiv\systems\2021\02\DO\CaBP1_2_DKO\non_inj\85433\DPOAE\15-40-38-DPOAEdpSPL.xls	0	0	0	0	0	0
z:\archiv\systems\2021\02\DO\CaBP1_2_DKO\non_inj\85433\DPOAE\15-45-53-DPOAEdpSPL.xls	0	0	-22.2488	-20.8226	-20.5236	-19.87
z:\archiv\systems\2021\02\DO\CaBP1_2_DKO\non_inj\85434\DPOAE\15-21-39-DPOAEdpSPL.xls	0	0	0	0	0	0
z:\archiv\systems\2021\02\DO\CaBP1_2_DKO\non_inj\85434\DPOAE\15-25-56-DPOAEdpSPL.xls	0	0	0	-23.2423	-19.4054	-17.3998
z:\archiv\systems\2021\02\DO\CaBP1_2_DKO\non_inj\85434\DPOAE\15-28-6-DPOAEdpSPL.xls	0	-20.8038	-19.2873	0	0	0

## Sheet: NoiseStd-4.7222
DPOAE	20	30	40	50	60	70		Mean	SEM	red		DPOAE	20	30	40	50	60	70		Mean	SEM	black
Mean	5.20316	5.23614	4.7682	5.73144	5.12202	4.90575		5.20316	0.57985			Mean	5.95492	4.83886	5.05043	4.8575	4.67015	4.08081		5.95492	0.550039
Std	1.1597	0.895129	1.47544	1.79255	1.23268	0.99954		5.23614	0.338327			Std	1.22992	1.1587	1.58585	1.07682	1.17705	0.65701		4.83886	0.518184
n	5	8	10	10	10	10		4.7682	0.491814			n	5	5	5	6	6	6		5.05043	0.709213
SEM	0.57985	0.338327	0.491814	0.597517	0.410892	0.33318		5.73144	0.597517			SEM	0.550039	0.518184	0.709213	0.43961	0.480528	0.268223		4.8575	0.43961
z:\archiv\systems\2020\02\DO\CaBP1_2_DKO\non_inj\16961\DPOAE\10-33-11-DPOAEdpSPL.xls	6.48645	3.88139	7.41262	4.58039	4.08631	4.60844		5.12202	0.410892			Z:\archiv\systems\2020\02\DO\16235_84\DPOAE\12-49-22-DPOAEdpSPL.xls	4.77983	6.64573	7.76494	4.0127	4.91552	3.74053		4.67015	0.480528
z:\archiv\systems\2020\02\DO\CaBP1_2_DKO\non_inj\16961\DPOAE\10-39-1-DPOAEdpSPL.xls	0	0	0	0	0	0		4.90575	0.33318			Z:\archiv\systems\2020\02\DO\16235_84\DPOAE\12-56-35-DPOAEdpSPL.xls	0	0	0	0	0	0		4.08081	0.268223
z:\archiv\systems\2020\02\DO\CaBP1_2_DKO\non_inj\16962\DPOAE\17-50-35-DPOAEdpSPL.xls	0	5.45345	6.44239	4.67046	7.21643	4.01618						Z:\archiv\systems\2020\02\DO\16236_85\DPOAE\12-48-1-DPOAEdpSPL.xls	4.83574	3.8056	4.3229	5.1723	4.01886	4.84293
z:\archiv\systems\2020\02\DO\CaBP1_2_DKO\non_inj\16962\DPOAE\17-55-42-DPOAEdpSPL.xls	0	0	0	0	0	0						Z:\archiv\systems\2020\02\DO\16236_85\DPOAE\12-54-13-DPOAEdpSPL.xls	0	0	0	0	0	0
z:\archiv\systems\2020\03\ST\CABP1_2_DKO\non_inj\24890\DPOAE\13-31-50-DPOAEdpSPL.xls	4.68591	5.47331	4.28748	5.66605	4.95339	3.61687						Z:\archiv\systems\2020\02\DO\16237_86\DPOAE\17-15-1-DPOAEdpSPL.xls	0	0	0	0	0	0
z:\archiv\systems\2020\03\ST\CABP1_2_DKO\non_inj\24890\DPOAE\13-37-60-DPOAEdpSPL.xls	0	0	0	0	0	0						Z:\archiv\systems\2020\02\DO\16237_86\DPOAE\17-9-9-DPOAEdpSPL.xls	7.40695	4.28755	5.1375	6.75448	5.58911	3.3331
z:\archiv\systems\2020\03\ST\CABP1_2_DKO\non_inj\24891\DPOAE\16-10-26-DPOAEdpSPL.xls	6.38424	5.87551	2.56084	7.81572	3.72792	4.58839						Z:\archiv\systems\2020\02\DO\16238_87\DPOAE\13-49-51-DPOAEdpSPL.xls	7.06681	5.3232	3.97209	3.69589	4.26896	3.49628
z:\archiv\systems\2020\03\ST\CABP1_2_DKO\non_inj\24891\DPOAE\16-16-28-DPOAEdpSPL.xls	0	0	0	0	0	0						Z:\archiv\systems\2020\02\DO\16238_87\DPOAE\13-54-6-DPOAEdpSPL.xls	0	0	0	0	0	0
z:\archiv\systems\2020\03\ST\CABP1_2_DKO\non_inj\24892\DPOAE\13-51-56-DPOAEdpSPL.xls	3.93412	4.1958	5.62734	5.67267	5.26129	6.43384						Z:\archiv\systems\2020\02\DO\16238_87\DPOAE\13-58-29-DPOAEdpSPL.xls	0	0	0	0	0	0
z:\archiv\systems\2020\03\ST\CABP1_2_DKO\non_inj\24892\DPOAE\14-0-31-DPOAEdpSPL.xls	0	0	0	0	0	0						Z:\archiv\systems\2020\02\DO\16242_91\DPOAE\11-36-34-DPOAEdpSPL.xls	5.68525	4.1322	4.05473	4.66557	6.26213	4.26531
z:\archiv\systems\2020\03\ST\CABP1_2_DKO\non_inj\24893\DPOAE\16-27-56-DPOAEdpSPL.xls	4.52505	5.17794	2.96344	9.84527	4.63751	4.33421						Z:\archiv\systems\2020\02\DO\16242_91\DPOAE\11-42-22-DPOAEdpSPL.xls	0	0	0	0	0	0
z:\archiv\systems\2020\03\ST\CABP1_2_DKO\non_inj\24893\DPOAE\16-34-6-DPOAEdpSPL.xls	0	0	0	0	0	0						Z:\archiv\systems\2021\02\DO\84357_11\DPOAE\12-42-39-DPOAEdpSPL.xls	0	0	0	0	0	0
z:\archiv\systems\2020\07\DO\CaBP1_2_DKO\non_inj\51487\Dpoae\9-37-32-DPOAEdpSPL.xls	0	6.70689	4.19866	5.01192	5.11829	5.12057						Z:\archiv\systems\2021\02\DO\84357_11\DPOAE\12-48-5-DPOAEdpSPL.xls	0	0	0	0	0	0
z:\archiv\systems\2020\07\DO\CaBP1_2_DKO\non_inj\51487\Dpoae\9-43-30-DPOAEdpSPL.xls	0	0	0	0	0	0						Z:\archiv\systems\2021\02\DO\84358_12\dpoae\10-22-54-DPOAEdpSPL.xls	0	0	0	0	0	0
z:\archiv\systems\2020\07\DO\CaBP1_2_DKO\non_inj\51488\Dpoae\11-13-42-DPOAEdpSPL.xls	0	0	0	0	0	0						Z:\archiv\systems\2021\02\DO\84358_12\dpoae\10-26-60-DPOAEdpSPL.xls	0	0	0	4.84403	2.96634	4.8067
z:\archiv\systems\2020\07\DO\CaBP1_2_DKO\non_inj\51488\Dpoae\11-7-41-DPOAEdpSPL.xls	0	0	4.99243	5.60516	4.47066	6.80006
z:\archiv\systems\2021\02\DO\CaBP1_2_DKO\non_inj\85433\DPOAE\15-40-38-DPOAEdpSPL.xls	0	0	0	0	0	0
z:\archiv\systems\2021\02\DO\CaBP1_2_DKO\non_inj\85433\DPOAE\15-45-53-DPOAEdpSPL.xls	0	0	4.23409	3.98809	4.38523	4.86069
z:\archiv\systems\2021\02\DO\CaBP1_2_DKO\non_inj\85434\DPOAE\15-21-39-DPOAEdpSPL.xls	0	0	0	0	0	0
z:\archiv\systems\2021\02\DO\CaBP1_2_DKO\non_inj\85434\DPOAE\15-25-56-DPOAEdpSPL.xls	0	0	0	4.45863	7.36321	4.67822
z:\archiv\systems\2021\02\DO\CaBP1_2_DKO\non_inj\85434\DPOAE\15-28-6-DPOAEdpSPL.xls	0	5.12486	4.9627	0	0	0

## Sheet: DP-6.6667
DPOAE	20	30	40	50	60	70		Mean	SEM	red		DPOAE	20	30	40	50	60	70		Mean	SEM	black	F1 Threshold (usually, F2, 10dB less, is shown	-18
Mean	-24.766	-22.9326	-23.3423	-16.7945	-16.0318	-7.99848		-24.766	1.33075			Mean	-22.2554	-23.0192	-23.5003	-16.5786	-15.203	-5.34449		-22.2554	0.723729		52.4765	53.6179
Std	2.66149	1.56264	2.85879	7.30156	5.67763	7.95851		-22.9326	0.590623			Std	1.61831	2.7756	2.64686	8.41729	4.68706	6.14087		-23.0192	1.24128		10.7886	8.23722
n	5	8	10	10	10	10		-23.3423	0.952929			n	5	5	5	7	7	7		-23.5003	1.18371		10	5
SEM	1.33075	0.590623	0.952929	2.43385	1.89254	2.65284		-16.7945	2.43385			SEM	0.723729	1.24128	1.18371	3.18144	1.77154	2.32103		-16.5786	3.18144		3.41167	3.6838
z:\archiv\systems\2020\02\DO\CaBP1_2_DKO\non_inj\16961\DPOAE\10-33-11-DPOAEdpSPL.xls	-22.3134	-23.6839	-22.2875	-20.368	-13.7346	-16.1569		-16.0318	1.89254			Z:\archiv\systems\2020\02\DO\16235_84\DPOAE\12-49-22-DPOAEdpSPL.xls	-22.4363	-21.8005	-24.4826	-22.0984	-10.9213	2.38316		-15.203	1.77154		53.5698	53.6668
z:\archiv\systems\2020\02\DO\CaBP1_2_DKO\non_inj\16961\DPOAE\10-39-1-DPOAEdpSPL.xls	0	0	0	0	0	0		-7.99848	2.65284			Z:\archiv\systems\2020\02\DO\16235_84\DPOAE\12-56-35-DPOAEdpSPL.xls	0	0	0	0	0	0		-5.34449	2.32103		0	0
z:\archiv\systems\2020\02\DO\CaBP1_2_DKO\non_inj\16962\DPOAE\17-50-35-DPOAEdpSPL.xls	0	-24.1497	-23.1843	-19.4581	-12.6971	1.27097						Z:\archiv\systems\2020\02\DO\16236_85\DPOAE\12-48-1-DPOAEdpSPL.xls	-19.8753	-19.864	-19.1774	-22.0596	-12.2022	-6.9727					52.1566	54.1183
z:\archiv\systems\2020\02\DO\CaBP1_2_DKO\non_inj\16962\DPOAE\17-55-42-DPOAEdpSPL.xls	0	0	0	0	0	0						Z:\archiv\systems\2020\02\DO\16236_85\DPOAE\12-54-13-DPOAEdpSPL.xls	0	0	0	0	0	0					0	0
z:\archiv\systems\2020\03\ST\CABP1_2_DKO\non_inj\24890\DPOAE\13-31-50-DPOAEdpSPL.xls	-27.7955	-23.2102	-18.3482	-8.85085	-8.90874	-6.94034						Z:\archiv\systems\2020\02\DO\16237_86\DPOAE\17-15-1-DPOAEdpSPL.xls	0	0	0	0	0	0					40.3666	0
z:\archiv\systems\2020\03\ST\CABP1_2_DKO\non_inj\24890\DPOAE\13-37-60-DPOAEdpSPL.xls	0	0	0	0	0	0						Z:\archiv\systems\2020\02\DO\16237_86\DPOAE\17-9-9-DPOAEdpSPL.xls	-21.5442	-22.4323	-25.2426	-29.1455	-24.5258	-14.9873					0	66.8416
z:\archiv\systems\2020\03\ST\CABP1_2_DKO\non_inj\24891\DPOAE\16-10-26-DPOAEdpSPL.xls	-27.4968	-23.1444	-29.6486	-23.049	-19.0457	-19.7277						Z:\archiv\systems\2020\02\DO\16238_87\DPOAE\13-49-51-DPOAEdpSPL.xls	-23.847	-23.6658	-22.8751	-16.4438	-15.7519	-10.7566					71.5757	47.5803
z:\archiv\systems\2020\03\ST\CABP1_2_DKO\non_inj\24891\DPOAE\16-16-28-DPOAEdpSPL.xls	0	0	0	0	0	0						Z:\archiv\systems\2020\02\DO\16238_87\DPOAE\13-54-6-DPOAEdpSPL.xls	0	0	0	0	0	0					0	0
z:\archiv\systems\2020\03\ST\CABP1_2_DKO\non_inj\24892\DPOAE\13-51-56-DPOAEdpSPL.xls	-23.4381	-22.2762	-24.5108	-24.7645	-22.3214	-11.2082						Z:\archiv\systems\2020\02\DO\16238_87\DPOAE\13-58-29-DPOAEdpSPL.xls	0	0	0	0	0	0					64.286	0
z:\archiv\systems\2020\03\ST\CABP1_2_DKO\non_inj\24892\DPOAE\14-0-31-DPOAEdpSPL.xls	0	0	0	0	0	0						Z:\archiv\systems\2020\02\DO\16242_91\DPOAE\11-36-34-DPOAEdpSPL.xls	-23.5742	-27.3334	-25.7239	-12.5936	-11.4068	-5.00886					0	45.8825
z:\archiv\systems\2020\03\ST\CABP1_2_DKO\non_inj\24893\DPOAE\16-27-56-DPOAEdpSPL.xls	-22.7861	-24.0686	-22.4327	-27.1319	-22.1184	-17.3281						Z:\archiv\systems\2020\02\DO\16242_91\DPOAE\11-42-22-DPOAEdpSPL.xls	0	0	0	0	0	0					64.0847	0
z:\archiv\systems\2020\03\ST\CABP1_2_DKO\non_inj\24893\DPOAE\16-34-6-DPOAEdpSPL.xls	0	0	0	0	0	0						Z:\archiv\systems\2021\02\DO\84357_11\DPOAE\12-42-39-DPOAEdpSPL.xls	0	0	0	0	0	0					0	0
z:\archiv\systems\2020\07\DO\CaBP1_2_DKO\non_inj\51487\Dpoae\9-37-32-DPOAEdpSPL.xls	0	-19.3556	-25.1778	-16.4219	-17.28	-5.94677						Z:\archiv\systems\2021\02\DO\84357_11\DPOAE\12-48-5-DPOAEdpSPL.xls	0	0	0	-7.76688	-16.8354	-2.51014					48.1977	0
z:\archiv\systems\2020\07\DO\CaBP1_2_DKO\non_inj\51487\Dpoae\9-43-30-DPOAEdpSPL.xls	0	0	0	0	0	0						Z:\archiv\systems\2021\02\DO\84358_12\dpoae\10-22-54-DPOAEdpSPL.xls	0	0	0	0	0	0					0	0
z:\archiv\systems\2020\07\DO\CaBP1_2_DKO\non_inj\51488\Dpoae\11-13-42-DPOAEdpSPL.xls	0	0	0	0	0	0						Z:\archiv\systems\2021\02\DO\84358_12\dpoae\10-26-60-DPOAEdpSPL.xls	0	0	0	-5.94271	-14.7775	0.441034					0	0
z:\archiv\systems\2020\07\DO\CaBP1_2_DKO\non_inj\51488\Dpoae\11-7-41-DPOAEdpSPL.xls	0	0	-22.0245	-12.2781	-15.9273	-6.01839																	44.1292
z:\archiv\systems\2021\02\DO\CaBP1_2_DKO\non_inj\85433\DPOAE\15-40-38-DPOAEdpSPL.xls	0	0	0	0	0	0																	0
z:\archiv\systems\2021\02\DO\CaBP1_2_DKO\non_inj\85433\DPOAE\15-45-53-DPOAEdpSPL.xls	0	0	-23.0134	-9.45768	-22.1607	-1.21944																	43.6984
z:\archiv\systems\2021\02\DO\CaBP1_2_DKO\non_inj\85434\DPOAE\15-21-39-DPOAEdpSPL.xls	0	0	0	0	0	0																	0
z:\archiv\systems\2021\02\DO\CaBP1_2_DKO\non_inj\85434\DPOAE\15-25-56-DPOAEdpSPL.xls	0	0	0	-6.16518	-6.12417	3.29015																	0
z:\archiv\systems\2021\02\DO\CaBP1_2_DKO\non_inj\85434\DPOAE\15-28-6-DPOAEdpSPL.xls	0	-23.5723	-22.7948	0	0	0																	42.7003

## Sheet: Noise-6.6667
DPOAE	20	30	40	50	60	70		Mean	SEM	red		DPOAE	20	30	40	50	60	70		Mean	SEM	black
Mean	-22.7027	-21.7534	-21.604	-22.0473	-20.9679	-15.0796		-22.7027	0.64943			Mean	-20.9582	-21.534	-21.5703	-20.7237	-19.0911	-15.3069		-20.9582	1.2083
Std	1.29886	1.199	1.38096	1.20285	2.07951	2.8868		-21.7534	0.453178			Std	2.70183	1.93201	3.41027	1.49737	2.45594	3.33083		-21.534	0.86402
n	5	8	10	10	10	10		-21.604	0.460319			n	5	5	5	7	7	7		-21.5703	1.52512
SEM	0.64943	0.453178	0.460319	0.400948	0.693169	0.962266		-22.0473	0.400948			SEM	1.2083	0.86402	1.52512	0.565952	0.928258	1.25894		-20.7237	0.565952
z:\archiv\systems\2020\02\DO\CaBP1_2_DKO\non_inj\16961\DPOAE\10-33-11-DPOAEdpSPL.xls	-24.1385	-19.7554	-22.8528	-22.935	-24.1802	-15.3142		-20.9679	0.693169			Z:\archiv\systems\2020\02\DO\16235_84\DPOAE\12-49-22-DPOAEdpSPL.xls	-23.6722	-22.6969	-22.3666	-18.7472	-20.523	-14.5876		-19.0911	0.928258
z:\archiv\systems\2020\02\DO\CaBP1_2_DKO\non_inj\16961\DPOAE\10-39-1-DPOAEdpSPL.xls	0	0	0	0	0	0		-15.0796	0.962266			Z:\archiv\systems\2020\02\DO\16235_84\DPOAE\12-56-35-DPOAEdpSPL.xls	0	0	0	0	0	0		-15.3069	1.25894
z:\archiv\systems\2020\02\DO\CaBP1_2_DKO\non_inj\16962\DPOAE\17-50-35-DPOAEdpSPL.xls	0	-21.3261	-19.7079	-22.1995	-19.7093	-13.9205						Z:\archiv\systems\2020\02\DO\16236_85\DPOAE\12-48-1-DPOAEdpSPL.xls	-19.3166	-18.7831	-23.5297	-19.492	-22.3084	-18.4906
z:\archiv\systems\2020\02\DO\CaBP1_2_DKO\non_inj\16962\DPOAE\17-55-42-DPOAEdpSPL.xls	0	0	0	0	0	0						Z:\archiv\systems\2020\02\DO\16236_85\DPOAE\12-54-13-DPOAEdpSPL.xls	0	0	0	0	0	0
z:\archiv\systems\2020\03\ST\CABP1_2_DKO\non_inj\24890\DPOAE\13-31-50-DPOAEdpSPL.xls	-22.4529	-22.7033	-20.5383	-22.7768	-20.6359	-14.2497						Z:\archiv\systems\2020\02\DO\16237_86\DPOAE\17-15-1-DPOAEdpSPL.xls	0	0	0	0	0	0
z:\archiv\systems\2020\03\ST\CABP1_2_DKO\non_inj\24890\DPOAE\13-37-60-DPOAEdpSPL.xls	0	0	0	0	0	0						Z:\archiv\systems\2020\02\DO\16237_86\DPOAE\17-9-9-DPOAEdpSPL.xls	-23.9885	-20.3834	-24.8475	-22.1426	-21.3342	-18.9052
z:\archiv\systems\2020\03\ST\CABP1_2_DKO\non_inj\24891\DPOAE\16-10-26-DPOAEdpSPL.xls	-22.5776	-21.7643	-19.6824	-22.7049	-22.2643	-19.9735						Z:\archiv\systems\2020\02\DO\16238_87\DPOAE\13-49-51-DPOAEdpSPL.xls	-19.7848	-22.2192	-21.1138	-23.0278	-16.2275	-13.3267
z:\archiv\systems\2020\03\ST\CABP1_2_DKO\non_inj\24891\DPOAE\16-16-28-DPOAEdpSPL.xls	0	0	0	0	0	0						Z:\archiv\systems\2020\02\DO\16238_87\DPOAE\13-54-6-DPOAEdpSPL.xls	0	0	0	0	0	0
z:\archiv\systems\2020\03\ST\CABP1_2_DKO\non_inj\24892\DPOAE\13-51-56-DPOAEdpSPL.xls	-20.75	-20.6028	-21.9417	-23.0236	-21.9986	-10.77						Z:\archiv\systems\2020\02\DO\16238_87\DPOAE\13-58-29-DPOAEdpSPL.xls	0	0	0	0	0	0
z:\archiv\systems\2020\03\ST\CABP1_2_DKO\non_inj\24892\DPOAE\14-0-31-DPOAEdpSPL.xls	0	0	0	0	0	0						Z:\archiv\systems\2020\02\DO\16242_91\DPOAE\11-36-34-DPOAEdpSPL.xls	-18.0291	-23.5877	-15.9938	-19.9239	-17.5536	-17.2587
z:\archiv\systems\2020\03\ST\CABP1_2_DKO\non_inj\24893\DPOAE\16-27-56-DPOAEdpSPL.xls	-23.5946	-22.1466	-22.3848	-23.7828	-20.4427	-13.8684						Z:\archiv\systems\2020\02\DO\16242_91\DPOAE\11-42-22-DPOAEdpSPL.xls	0	0	0	0	0	0
z:\archiv\systems\2020\03\ST\CABP1_2_DKO\non_inj\24893\DPOAE\16-34-6-DPOAEdpSPL.xls	0	0	0	0	0	0						Z:\archiv\systems\2021\02\DO\84357_11\DPOAE\12-42-39-DPOAEdpSPL.xls	0	0	0	0	0	0
z:\archiv\systems\2020\07\DO\CaBP1_2_DKO\non_inj\51487\Dpoae\9-37-32-DPOAEdpSPL.xls	0	-22.1431	-20.5096	-20.1944	-16.9864	-17.7767						Z:\archiv\systems\2021\02\DO\84357_11\DPOAE\12-48-5-DPOAEdpSPL.xls	0	0	0	-20.981	-19.4411	-15.2075
z:\archiv\systems\2020\07\DO\CaBP1_2_DKO\non_inj\51487\Dpoae\9-43-30-DPOAEdpSPL.xls	0	0	0	0	0	0						Z:\archiv\systems\2021\02\DO\84358_12\dpoae\10-22-54-DPOAEdpSPL.xls	0	0	0	0	0	0
z:\archiv\systems\2020\07\DO\CaBP1_2_DKO\non_inj\51488\Dpoae\11-13-42-DPOAEdpSPL.xls	0	0	0	0	0	0						Z:\archiv\systems\2021\02\DO\84358_12\dpoae\10-26-60-DPOAEdpSPL.xls	0	0	0	-20.7512	-16.2503	-9.37186
z:\archiv\systems\2020\07\DO\CaBP1_2_DKO\non_inj\51488\Dpoae\11-7-41-DPOAEdpSPL.xls	0	0	-22.2528	-21.1491	-23.377	-18.4419
z:\archiv\systems\2021\02\DO\CaBP1_2_DKO\non_inj\85433\DPOAE\15-40-38-DPOAEdpSPL.xls	0	0	0	0	0	0
z:\archiv\systems\2021\02\DO\CaBP1_2_DKO\non_inj\85433\DPOAE\15-45-53-DPOAEdpSPL.xls	0	0	-23.5605	-21.1624	-20.5507	-11.9024
z:\archiv\systems\2021\02\DO\CaBP1_2_DKO\non_inj\85434\DPOAE\15-21-39-DPOAEdpSPL.xls	0	0	0	0	0	0
z:\archiv\systems\2021\02\DO\CaBP1_2_DKO\non_inj\85434\DPOAE\15-25-56-DPOAEdpSPL.xls	0	0	0	-20.5448	-19.5336	-14.5783
z:\archiv\systems\2021\02\DO\CaBP1_2_DKO\non_inj\85434\DPOAE\15-28-6-DPOAEdpSPL.xls	0	-23.5853	-22.6092	0	0	0

## Sheet: NoiseStd-6.6667
DPOAE	20	30	40	50	60	70		Mean	SEM	red		DPOAE	20	30	40	50	60	70		Mean	SEM	black
Mean	5.30802	5.15582	4.70062	5.29354	4.09565	3.92011		5.30802	0.944054			Mean	5.43043	5.63464	5.34305	4.97304	5.27453	2.51948		5.43043	0.6048
Std	1.88811	1.10717	1.26119	1.73274	0.713099	1.27618		5.15582	0.418472			Std	1.35237	1.22031	0.750973	1.17236	2.2244	0.927021		5.63464	0.545738
n	5	8	10	10	10	10		4.70062	0.420396			n	5	5	5	7	7	7		5.34305	0.335845
SEM	0.944054	0.418472	0.420396	0.57758	0.2377	0.425393		5.29354	0.57758			SEM	0.6048	0.545738	0.335845	0.443112	0.840746	0.350381		4.97304	0.443112
z:\archiv\systems\2020\02\DO\CaBP1_2_DKO\non_inj\16961\DPOAE\10-33-11-DPOAEdpSPL.xls	5.63103	5.73493	3.80277	3.36091	3.54265	6.58071		4.09565	0.2377			Z:\archiv\systems\2020\02\DO\16235_84\DPOAE\12-49-22-DPOAEdpSPL.xls	3.36792	7.59178	4.60442	4.43271	3.70853	1.91769		5.27453	0.840746
z:\archiv\systems\2020\02\DO\CaBP1_2_DKO\non_inj\16961\DPOAE\10-39-1-DPOAEdpSPL.xls	0	0	0	0	0	0		3.92011	0.425393			Z:\archiv\systems\2020\02\DO\16235_84\DPOAE\12-56-35-DPOAEdpSPL.xls	0	0	0	0	0	0		2.51948	0.350381
z:\archiv\systems\2020\02\DO\CaBP1_2_DKO\non_inj\16962\DPOAE\17-50-35-DPOAEdpSPL.xls	0	4.6806	5.8788	3.74034	4.93277	3.66837						Z:\archiv\systems\2020\02\DO\16236_85\DPOAE\12-48-1-DPOAEdpSPL.xls	5.06886	5.01186	6.26831	3.44683	3.71949	3.35542
z:\archiv\systems\2020\02\DO\CaBP1_2_DKO\non_inj\16962\DPOAE\17-55-42-DPOAEdpSPL.xls	0	0	0	0	0	0						Z:\archiv\systems\2020\02\DO\16236_85\DPOAE\12-54-13-DPOAEdpSPL.xls	0	0	0	0	0	0
z:\archiv\systems\2020\03\ST\CABP1_2_DKO\non_inj\24890\DPOAE\13-31-50-DPOAEdpSPL.xls	4.37101	7.26866	4.18324	4.81212	5.23314	3.29357						Z:\archiv\systems\2020\02\DO\16237_86\DPOAE\17-15-1-DPOAEdpSPL.xls	0	0	0	0	0	0
z:\archiv\systems\2020\03\ST\CABP1_2_DKO\non_inj\24890\DPOAE\13-37-60-DPOAEdpSPL.xls	0	0	0	0	0	0						Z:\archiv\systems\2020\02\DO\16237_86\DPOAE\17-9-9-DPOAEdpSPL.xls	5.7057	4.41279	5.34699	6.23884	9.30807	3.57138
z:\archiv\systems\2020\03\ST\CABP1_2_DKO\non_inj\24891\DPOAE\16-10-26-DPOAEdpSPL.xls	4.98748	6.09396	4.74303	7.60156	4.64928	5.70457						Z:\archiv\systems\2020\02\DO\16238_87\DPOAE\13-49-51-DPOAEdpSPL.xls	5.9821	5.23262	5.89428	5.22774	7.39492	2.45067
z:\archiv\systems\2020\03\ST\CABP1_2_DKO\non_inj\24891\DPOAE\16-16-28-DPOAEdpSPL.xls	0	0	0	0	0	0						Z:\archiv\systems\2020\02\DO\16238_87\DPOAE\13-54-6-DPOAEdpSPL.xls	0	0	0	0	0	0
z:\archiv\systems\2020\03\ST\CABP1_2_DKO\non_inj\24892\DPOAE\13-51-56-DPOAEdpSPL.xls	8.29898	4.27174	7.56282	5.33845	4.1085	2.63167						Z:\archiv\systems\2020\02\DO\16238_87\DPOAE\13-58-29-DPOAEdpSPL.xls	0	0	0	0	0	0
z:\archiv\systems\2020\03\ST\CABP1_2_DKO\non_inj\24892\DPOAE\14-0-31-DPOAEdpSPL.xls	0	0	0	0	0	0						Z:\archiv\systems\2020\02\DO\16242_91\DPOAE\11-36-34-DPOAEdpSPL.xls	7.02757	5.92413	4.60124	6.75519	3.83763	1.79915
z:\archiv\systems\2020\03\ST\CABP1_2_DKO\non_inj\24893\DPOAE\16-27-56-DPOAEdpSPL.xls	3.25159	4.29789	3.07	4.0026	3.74401	2.82458						Z:\archiv\systems\2020\02\DO\16242_91\DPOAE\11-42-22-DPOAEdpSPL.xls	0	0	0	0	0	0
z:\archiv\systems\2020\03\ST\CABP1_2_DKO\non_inj\24893\DPOAE\16-34-6-DPOAEdpSPL.xls	0	0	0	0	0	0						Z:\archiv\systems\2021\02\DO\84357_11\DPOAE\12-42-39-DPOAEdpSPL.xls	0	0	0	0	0	0
z:\archiv\systems\2020\07\DO\CaBP1_2_DKO\non_inj\51487\Dpoae\9-37-32-DPOAEdpSPL.xls	0	4.1668	4.41991	7.44798	3.56555	4.0766						Z:\archiv\systems\2021\02\DO\84357_11\DPOAE\12-48-5-DPOAEdpSPL.xls	0	0	0	4.25963	5.07384	3.35307
z:\archiv\systems\2020\07\DO\CaBP1_2_DKO\non_inj\51487\Dpoae\9-43-30-DPOAEdpSPL.xls	0	0	0	0	0	0						Z:\archiv\systems\2021\02\DO\84358_12\dpoae\10-22-54-DPOAEdpSPL.xls	0	0	0	0	0	0
z:\archiv\systems\2020\07\DO\CaBP1_2_DKO\non_inj\51488\Dpoae\11-13-42-DPOAEdpSPL.xls	0	0	0	0	0	0						Z:\archiv\systems\2021\02\DO\84358_12\dpoae\10-26-60-DPOAEdpSPL.xls	0	0	0	4.45035	3.87921	1.18896
z:\archiv\systems\2020\07\DO\CaBP1_2_DKO\non_inj\51488\Dpoae\11-7-41-DPOAEdpSPL.xls	0	0	3.89946	4.03367	4.60268	3.89326
z:\archiv\systems\2021\02\DO\CaBP1_2_DKO\non_inj\85433\DPOAE\15-40-38-DPOAEdpSPL.xls	0	0	0	0	0	0
z:\archiv\systems\2021\02\DO\CaBP1_2_DKO\non_inj\85433\DPOAE\15-45-53-DPOAEdpSPL.xls	0	0	4.34969	7.9415	3.34454	3.5736
z:\archiv\systems\2021\02\DO\CaBP1_2_DKO\non_inj\85434\DPOAE\15-21-39-DPOAEdpSPL.xls	0	0	0	0	0	0
z:\archiv\systems\2021\02\DO\CaBP1_2_DKO\non_inj\85434\DPOAE\15-25-56-DPOAEdpSPL.xls	0	0	0	4.65623	3.23334	2.95413
z:\archiv\systems\2021\02\DO\CaBP1_2_DKO\non_inj\85434\DPOAE\15-28-6-DPOAEdpSPL.xls	0	4.73201	5.09646	0	0	0

## Sheet: DP-9.4444
DPOAE	20	30	40	50	60	70		Mean	SEM	red		DPOAE	20	30	40	50	60	70		Mean	SEM	black	F1 Threshold (usually, F2, 10dB less, is shown	-18
Mean	-22.9606	-22.2308	-16.753	-9.95985	-3.48701	-0.381163		-22.9606	0.851485			Mean	-24.055	-21.1267	-10.8833	-3.26375	-5.94007	-1.31484		-24.055	0.652793		47.1597	33.2059
Std	1.70297	4.35616	7.78702	13.1221	11.1406	10.6572		-22.2308	1.54014			Std	1.72713	4.39896	4.69124	5.66276	6.07654	6.32782		-21.1267	1.66265		14.4456	4.98143
n	5	9	10	10	10	10		-16.753	2.59567			n	7	7	7	7	7	7		-10.8833	1.77312		8	7
SEM	0.851485	1.54014	2.59567	4.37405	3.71353	3.55242		-9.95985	4.37405			SEM	0.652793	1.66265	1.77312	2.14032	2.29672	2.39169		-3.26375	2.14032		5.10728	1.8828
z:\archiv\systems\2020\02\DO\CaBP1_2_DKO\non_inj\16961\DPOAE\10-33-11-DPOAEdpSPL.xls	-23.1059	-23.0512	-21.6363	-27.2604	-5.56384	-2.05648		-3.48701	3.71353			Z:\archiv\systems\2020\02\DO\16235_84\DPOAE\12-49-22-DPOAEdpSPL.xls								-5.94007	2.29672		54.2681	0
z:\archiv\systems\2020\02\DO\CaBP1_2_DKO\non_inj\16961\DPOAE\10-39-1-DPOAEdpSPL.xls								-0.381163	3.55242			Z:\archiv\systems\2020\02\DO\16235_84\DPOAE\12-56-35-DPOAEdpSPL.xls	-25.0501	-18.8274	-5.1907	4.97378	-4.15676	7.4794		-1.31484	2.39169		0	30.6068
z:\archiv\systems\2020\02\DO\CaBP1_2_DKO\non_inj\16962\DPOAE\17-50-35-DPOAEdpSPL.xls		-19.4283	-12.8586	1.87818	2.88356	6.22791						Z:\archiv\systems\2020\02\DO\16236_85\DPOAE\12-48-1-DPOAEdpSPL.xls	-25.788	-25.2068	-20.2142	-9.98848	-9.85726	-6.84115					32.1741	42.1653
z:\archiv\systems\2020\02\DO\CaBP1_2_DKO\non_inj\16962\DPOAE\17-55-42-DPOAEdpSPL.xls												Z:\archiv\systems\2020\02\DO\16236_85\DPOAE\12-54-13-DPOAEdpSPL.xls											0	0
z:\archiv\systems\2020\03\ST\CABP1_2_DKO\non_inj\24890\DPOAE\13-31-50-DPOAEdpSPL.xls	-20.2072	-27.7709	-21.1441	-13.2087	-3.69459	2.67921						Z:\archiv\systems\2020\02\DO\16237_86\DPOAE\17-15-1-DPOAEdpSPL.xls											43.9621	0
z:\archiv\systems\2020\03\ST\CABP1_2_DKO\non_inj\24890\DPOAE\13-37-60-DPOAEdpSPL.xls												Z:\archiv\systems\2020\02\DO\16237_86\DPOAE\17-9-9-DPOAEdpSPL.xls	-23.2416	-24.9991	-10.2932	-0.638991	2.01535	-6.26037					0	34.7594
z:\archiv\systems\2020\03\ST\CABP1_2_DKO\non_inj\24891\DPOAE\16-10-26-DPOAEdpSPL.xls	-22.798											Z:\archiv\systems\2020\02\DO\16238_87\DPOAE\13-49-51-DPOAEdpSPL.xls	-20.9971	-22.5135	-8.63596	-1.60151	-2.41055	-0.498686					49.5069	33.2524
z:\archiv\systems\2020\03\ST\CABP1_2_DKO\non_inj\24891\DPOAE\16-16-28-DPOAEdpSPL.xls												Z:\archiv\systems\2020\02\DO\16238_87\DPOAE\13-54-6-DPOAEdpSPL.xls											0	0
z:\archiv\systems\2020\03\ST\CABP1_2_DKO\non_inj\24892\DPOAE\13-51-56-DPOAEdpSPL.xls	-24.6042	-21.7441	-23.8975	-22.3296	-13.6725	-2.12741						Z:\archiv\systems\2020\02\DO\16238_87\DPOAE\13-58-29-DPOAEdpSPL.xls											55.0012	0
z:\archiv\systems\2020\03\ST\CABP1_2_DKO\non_inj\24892\DPOAE\14-0-31-DPOAEdpSPL.xls												Z:\archiv\systems\2020\02\DO\16242_91\DPOAE\11-36-34-DPOAEdpSPL.xls	-23.023	-24.2649	-10.2909	1.03841	-4.27204	4.13579					0	34.4833
z:\archiv\systems\2020\03\ST\CABP1_2_DKO\non_inj\24893\DPOAE\16-27-56-DPOAEdpSPL.xls	-24.0877	-29.6796	-25.8455	-23.307	-22.4297	-22.65						Z:\archiv\systems\2020\02\DO\16242_91\DPOAE\11-42-22-DPOAEdpSPL.xls											74.2287	0
z:\archiv\systems\2020\03\ST\CABP1_2_DKO\non_inj\24893\DPOAE\16-34-6-DPOAEdpSPL.xls												Z:\archiv\systems\2021\02\DO\84357_11\DPOAE\12-42-39-DPOAEdpSPL.xls	-25.6226	-18.8314	-12.6236	-8.57612	-17.0969	-9.39756					0	31.3393
z:\archiv\systems\2020\07\DO\CaBP1_2_DKO\non_inj\51487\Dpoae\9-37-32-DPOAEdpSPL.xls		-22.9647	-16.853	-7.89683	-7.69452	-3.54382						Z:\archiv\systems\2021\02\DO\84357_11\DPOAE\12-48-5-DPOAEdpSPL.xls											38.1233	0
z:\archiv\systems\2020\07\DO\CaBP1_2_DKO\non_inj\51487\Dpoae\9-43-30-DPOAEdpSPL.xls												Z:\archiv\systems\2021\02\DO\84358_12\dpoae\10-22-54-DPOAEdpSPL.xls	-24.6628	-13.2441	-8.93458	-8.05332	-5.80235	2.1787					0	25.835
z:\archiv\systems\2020\07\DO\CaBP1_2_DKO\non_inj\51488\Dpoae\11-13-42-DPOAEdpSPL.xls												Z:\archiv\systems\2021\02\DO\84358_12\dpoae\10-26-60-DPOAEdpSPL.xls											0	0
z:\archiv\systems\2020\07\DO\CaBP1_2_DKO\non_inj\51488\Dpoae\11-7-41-DPOAEdpSPL.xls			-15.4458	-6.99036	-2.27145	-4.86088																	0
z:\archiv\systems\2021\02\DO\CaBP1_2_DKO\non_inj\85433\DPOAE\15-40-38-DPOAEdpSPL.xls		-16.0855	-2.36771	9.07628	12.5959	15.3838																	0
z:\archiv\systems\2021\02\DO\CaBP1_2_DKO\non_inj\85433\DPOAE\15-45-53-DPOAEdpSPL.xls																							0
z:\archiv\systems\2021\02\DO\CaBP1_2_DKO\non_inj\85434\DPOAE\15-21-39-DPOAEdpSPL.xls		-18.0159	-5.77434	8.24772	13.8958	12.4448																	30.013
z:\archiv\systems\2021\02\DO\CaBP1_2_DKO\non_inj\85434\DPOAE\15-25-56-DPOAEdpSPL.xls																							0
z:\archiv\systems\2021\02\DO\CaBP1_2_DKO\non_inj\85434\DPOAE\15-28-6-DPOAEdpSPL.xls												mean	-24.055	-21.1267	-10.8833	-3.26375	-5.94007	-1.31484					0
												median	-23.9522	-20.6725	-9.61272	-1.12025	-4.2144	0.840009
mean	-22.9606	-22.3425	-16.2025	-9.08786	-2.88348	0.166345
median	-23.1059	-22.3544	-16.853	-7.89683	-3.69459	-2.05648

## Sheet: Noise-9.4444
DPOAE	20	30	40	50	60	70		Mean	SEM	red		DPOAE	20	30	40	50	60	70		Mean	SEM	black
Mean	-23.2701	-21.6371	-21.632	-18.6748	-17.4772	-16.3018		-23.2701	1.08717			Mean	-22.0003	-22.6921	-21.588	-19.6453	-20.3846	-18.0257		-22.0003	0.611267
Std	2.17434	1.65844	1.8023	4.92056	4.83697	5.8304		-21.6371	0.586346			Std	1.61726	1.69785	2.64787	2.50949	1.63462	2.85233		-22.6921	0.641727
n	5	9	10	10	10	10		-21.632	0.600767			n	7	7	7	7	7	7		-21.588	1.0008
SEM	1.08717	0.586346	0.600767	1.64019	1.61232	1.94347		-18.6748	1.64019			SEM	0.611267	0.641727	1.0008	0.9485	0.617829	1.07808		-19.6453	0.9485
z:\archiv\systems\2020\02\DO\CaBP1_2_DKO\non_inj\16961\DPOAE\10-33-11-DPOAEdpSPL.xls	-20.9719	-22.1236	-24.7362	-19.8969	-22.419	-21.6189		-17.4772	1.61232			Z:\archiv\systems\2020\02\DO\16235_84\DPOAE\12-49-22-DPOAEdpSPL.xls	0	0	0	0	0	0		-20.3846	0.617829
z:\archiv\systems\2020\02\DO\CaBP1_2_DKO\non_inj\16961\DPOAE\10-39-1-DPOAEdpSPL.xls	0	0	0	0	0	0		-16.3018	1.94347			Z:\archiv\systems\2020\02\DO\16235_84\DPOAE\12-56-35-DPOAEdpSPL.xls	-22.1648	-21.607	-18.3227	-16.5587	-18.4452	-14.9187		-18.0257	1.07808
z:\archiv\systems\2020\02\DO\CaBP1_2_DKO\non_inj\16962\DPOAE\17-50-35-DPOAEdpSPL.xls	0	-22.3911	-20.5389	-17.895	-14.5858	-13.0951						Z:\archiv\systems\2020\02\DO\16236_85\DPOAE\12-48-1-DPOAEdpSPL.xls	-19.7792	-21.3528	-22.0572	-22.5102	-22.5918	-19.6924
z:\archiv\systems\2020\02\DO\CaBP1_2_DKO\non_inj\16962\DPOAE\17-55-42-DPOAEdpSPL.xls	0	0	0	0	0	0						Z:\archiv\systems\2020\02\DO\16236_85\DPOAE\12-54-13-DPOAEdpSPL.xls	0	0	0	0	0	0
z:\archiv\systems\2020\03\ST\CABP1_2_DKO\non_inj\24890\DPOAE\13-31-50-DPOAEdpSPL.xls	-24.2514	-20.4556	-21.7779	-20.4752	-19.1243	-18.6641						Z:\archiv\systems\2020\02\DO\16237_86\DPOAE\17-15-1-DPOAEdpSPL.xls	0	0	0	0	0	0
z:\archiv\systems\2020\03\ST\CABP1_2_DKO\non_inj\24890\DPOAE\13-37-60-DPOAEdpSPL.xls	0	0	0	0	0	0						Z:\archiv\systems\2020\02\DO\16237_86\DPOAE\17-9-9-DPOAEdpSPL.xls	-23.3487	-26.2018	-20.0901	-19.0345	-18.8326	-21.9894
z:\archiv\systems\2020\03\ST\CABP1_2_DKO\non_inj\24891\DPOAE\16-10-26-DPOAEdpSPL.xls	-21.4805	-20.2974	-22.0193	-21.1838	-19.6639	-20.5019						Z:\archiv\systems\2020\02\DO\16238_87\DPOAE\13-49-51-DPOAEdpSPL.xls	-23.1864	-22.7655	-20.9846	-17.677	-20.5583	-18.5592
z:\archiv\systems\2020\03\ST\CABP1_2_DKO\non_inj\24891\DPOAE\16-16-28-DPOAEdpSPL.xls	0	0	0	0	0	0						Z:\archiv\systems\2020\02\DO\16238_87\DPOAE\13-54-6-DPOAEdpSPL.xls	0	0	0	0	0	0
z:\archiv\systems\2020\03\ST\CABP1_2_DKO\non_inj\24892\DPOAE\13-51-56-DPOAEdpSPL.xls	-23.3005	-25.2705	-22.4412	-25.5975	-22.634	-16.3606						Z:\archiv\systems\2020\02\DO\16238_87\DPOAE\13-58-29-DPOAEdpSPL.xls	0	0	0	0	0	0
z:\archiv\systems\2020\03\ST\CABP1_2_DKO\non_inj\24892\DPOAE\14-0-31-DPOAEdpSPL.xls	0	0	0	0	0	0						Z:\archiv\systems\2020\02\DO\16242_91\DPOAE\11-36-34-DPOAEdpSPL.xls	-23.9545	-21.3048	-20.75	-17.6321	-19.0134	-16.9244
z:\archiv\systems\2020\03\ST\CABP1_2_DKO\non_inj\24893\DPOAE\16-27-56-DPOAEdpSPL.xls	-26.3462	-22.527	-23.2169	-23.5582	-21.252	-21.1963						Z:\archiv\systems\2020\02\DO\16242_91\DPOAE\11-42-22-DPOAEdpSPL.xls	0	0	0	0	0	0
z:\archiv\systems\2020\03\ST\CABP1_2_DKO\non_inj\24893\DPOAE\16-34-6-DPOAEdpSPL.xls	0	0	0	0	0	0						Z:\archiv\systems\2021\02\DO\84357_11\DPOAE\12-42-39-DPOAEdpSPL.xls	-21.3888	-22.9655	-22.065	-21.7677	-21.6086	-19.986
z:\archiv\systems\2020\07\DO\CaBP1_2_DKO\non_inj\51487\Dpoae\9-37-32-DPOAEdpSPL.xls	0	-21.0631	-20.2865	-15.4483	-18.501	-16.6585						Z:\archiv\systems\2021\02\DO\84357_11\DPOAE\12-48-5-DPOAEdpSPL.xls	0	0	0	0	0	0
z:\archiv\systems\2020\07\DO\CaBP1_2_DKO\non_inj\51487\Dpoae\9-43-30-DPOAEdpSPL.xls	0	0	0	0	0	0						Z:\archiv\systems\2021\02\DO\84358_12\dpoae\10-22-54-DPOAEdpSPL.xls	-20.1796	-22.6475	-26.8461	-22.337	-21.6422	-14.11
z:\archiv\systems\2020\07\DO\CaBP1_2_DKO\non_inj\51488\Dpoae\11-13-42-DPOAEdpSPL.xls	0	0	0	0	0	0						Z:\archiv\systems\2021\02\DO\84358_12\dpoae\10-26-60-DPOAEdpSPL.xls	0	0	0	0	0	0
z:\archiv\systems\2020\07\DO\CaBP1_2_DKO\non_inj\51488\Dpoae\11-7-41-DPOAEdpSPL.xls	0	0	-22.0096	-20.7045	-17.1046	-21.6523
z:\archiv\systems\2021\02\DO\CaBP1_2_DKO\non_inj\85433\DPOAE\15-40-38-DPOAEdpSPL.xls	0	-20.5509	-18.0295	-9.99835	-7.66407	-8.14695
z:\archiv\systems\2021\02\DO\CaBP1_2_DKO\non_inj\85433\DPOAE\15-45-53-DPOAEdpSPL.xls	0	0	0	0	0	0
z:\archiv\systems\2021\02\DO\CaBP1_2_DKO\non_inj\85434\DPOAE\15-21-39-DPOAEdpSPL.xls	0	-20.0546	-21.2641	-11.99	-11.8235	-5.12365
z:\archiv\systems\2021\02\DO\CaBP1_2_DKO\non_inj\85434\DPOAE\15-25-56-DPOAEdpSPL.xls	0	0	0	0	0	0
z:\archiv\systems\2021\02\DO\CaBP1_2_DKO\non_inj\85434\DPOAE\15-28-6-DPOAEdpSPL.xls	0	0	0	0	0	0

## Sheet: NoiseStd-9.4444
DPOAE	20	30	40	50	60	70		Mean	SEM	red		DPOAE	20	30	40	50	60	70		Mean	SEM	black
Mean	4.17607	5.46334	5.2742	4.58593	4.67433	4.55004		4.17607	0.387626			Mean	5.08783	5.36665	4.71722	5.10467	4.48217	5.13859		5.08783	0.554615
Std	0.775252	0.929957	1.26796	1.23636	1.65132	1.2518		5.46334	0.328789			Std	1.46737	1.3383	1.17365	1.42698	1.4818	1.1524		5.36665	0.505829
n	5	9	10	10	10	10		5.2742	0.422654			n	7	7	7	7	7	7		4.71722	0.443598
SEM	0.387626	0.328789	0.422654	0.412119	0.550439	0.417266		4.58593	0.412119			SEM	0.554615	0.505829	0.443598	0.539349	0.560069	0.435567		5.10467	0.539349
z:\archiv\systems\2020\02\DO\CaBP1_2_DKO\non_inj\16961\DPOAE\10-33-11-DPOAEdpSPL.xls	5.52346	5.23497	4.78137	6.13441	6.79868	5.85306		4.67433	0.550439			Z:\archiv\systems\2020\02\DO\16235_84\DPOAE\12-49-22-DPOAEdpSPL.xls	0	0	0	0	0	0		4.48217	0.560069
z:\archiv\systems\2020\02\DO\CaBP1_2_DKO\non_inj\16961\DPOAE\10-39-1-DPOAEdpSPL.xls	0	0	0	0	0	0		4.55004	0.417266			Z:\archiv\systems\2020\02\DO\16235_84\DPOAE\12-56-35-DPOAEdpSPL.xls	5.39017	6.71122	3.84853	5.75586	4.97484	4.74395		5.13859	0.435567
z:\archiv\systems\2020\02\DO\CaBP1_2_DKO\non_inj\16962\DPOAE\17-50-35-DPOAEdpSPL.xls	0	4.55194	5.43384	5.83997	3.72322	4.43186						Z:\archiv\systems\2020\02\DO\16236_85\DPOAE\12-48-1-DPOAEdpSPL.xls	4.515	5.21903	3.99841	3.43194	2.15103	3.98313
z:\archiv\systems\2020\02\DO\CaBP1_2_DKO\non_inj\16962\DPOAE\17-55-42-DPOAEdpSPL.xls	0	0	0	0	0	0						Z:\archiv\systems\2020\02\DO\16236_85\DPOAE\12-54-13-DPOAEdpSPL.xls	0	0	0	0	0	0
z:\archiv\systems\2020\03\ST\CABP1_2_DKO\non_inj\24890\DPOAE\13-31-50-DPOAEdpSPL.xls	4.02437	4.63523	6.20583	3.27995	4.44191	3.48223						Z:\archiv\systems\2020\02\DO\16237_86\DPOAE\17-15-1-DPOAEdpSPL.xls	0	0	0	0	0	0
z:\archiv\systems\2020\03\ST\CABP1_2_DKO\non_inj\24890\DPOAE\13-37-60-DPOAEdpSPL.xls	0	0	0	0	0	0						Z:\archiv\systems\2020\02\DO\16237_86\DPOAE\17-9-9-DPOAEdpSPL.xls	7.72221	5.62684	4.60245	3.74517	6.17813	6.09731
z:\archiv\systems\2020\03\ST\CABP1_2_DKO\non_inj\24891\DPOAE\16-10-26-DPOAEdpSPL.xls	3.80482	5.77822	4.91191	6.69555	4.21498	4.71654						Z:\archiv\systems\2020\02\DO\16238_87\DPOAE\13-49-51-DPOAEdpSPL.xls	5.20045	3.91791	7.24195	7.48685	3.99517	5.12483
z:\archiv\systems\2020\03\ST\CABP1_2_DKO\non_inj\24891\DPOAE\16-16-28-DPOAEdpSPL.xls	0	0	0	0	0	0						Z:\archiv\systems\2020\02\DO\16238_87\DPOAE\13-54-6-DPOAEdpSPL.xls	0	0	0	0	0	0
z:\archiv\systems\2020\03\ST\CABP1_2_DKO\non_inj\24892\DPOAE\13-51-56-DPOAEdpSPL.xls	3.55419	7.50999	7.48081	3.24847	7.43271	6.25641						Z:\archiv\systems\2020\02\DO\16238_87\DPOAE\13-58-29-DPOAEdpSPL.xls	0	0	0	0	0	0
z:\archiv\systems\2020\03\ST\CABP1_2_DKO\non_inj\24892\DPOAE\14-0-31-DPOAEdpSPL.xls	0	0	0	0	0	0						Z:\archiv\systems\2020\02\DO\16242_91\DPOAE\11-36-34-DPOAEdpSPL.xls	2.96413	7.48427	4.1771	4.32396	6.09207	4.13008
z:\archiv\systems\2020\03\ST\CABP1_2_DKO\non_inj\24893\DPOAE\16-27-56-DPOAEdpSPL.xls	3.97349	5.67406	4.54955	3.68736	5.93902	5.40635						Z:\archiv\systems\2020\02\DO\16242_91\DPOAE\11-42-22-DPOAEdpSPL.xls	0	0	0	0	0	0
z:\archiv\systems\2020\03\ST\CABP1_2_DKO\non_inj\24893\DPOAE\16-34-6-DPOAEdpSPL.xls	0	0	0	0	0	0						Z:\archiv\systems\2021\02\DO\84357_11\DPOAE\12-42-39-DPOAEdpSPL.xls	5.60947	4.35757	4.94644	4.96566	3.18213	7.218
z:\archiv\systems\2020\07\DO\CaBP1_2_DKO\non_inj\51487\Dpoae\9-37-32-DPOAEdpSPL.xls	0	5.38542	3.36199	4.22858	4.87086	3.77249						Z:\archiv\systems\2021\02\DO\84357_11\DPOAE\12-48-5-DPOAEdpSPL.xls	0	0	0	0	0	0
z:\archiv\systems\2020\07\DO\CaBP1_2_DKO\non_inj\51487\Dpoae\9-43-30-DPOAEdpSPL.xls	0	0	0	0	0	0						Z:\archiv\systems\2021\02\DO\84358_12\dpoae\10-22-54-DPOAEdpSPL.xls	4.21336	4.24975	4.20566	6.02324	4.80179	4.67281
z:\archiv\systems\2020\07\DO\CaBP1_2_DKO\non_inj\51488\Dpoae\11-13-42-DPOAEdpSPL.xls	0	0	0	0	0	0						Z:\archiv\systems\2021\02\DO\84358_12\dpoae\10-26-60-DPOAEdpSPL.xls	0	0	0	0	0	0
z:\archiv\systems\2020\07\DO\CaBP1_2_DKO\non_inj\51488\Dpoae\11-7-41-DPOAEdpSPL.xls	0	0	6.93051	4.79954	4.29442	5.77961
z:\archiv\systems\2021\02\DO\CaBP1_2_DKO\non_inj\85433\DPOAE\15-40-38-DPOAEdpSPL.xls	0	5.86079	4.13151	4.20648	2.77064	2.79457
z:\archiv\systems\2021\02\DO\CaBP1_2_DKO\non_inj\85433\DPOAE\15-45-53-DPOAEdpSPL.xls	0	0	0	0	0	0
z:\archiv\systems\2021\02\DO\CaBP1_2_DKO\non_inj\85434\DPOAE\15-21-39-DPOAEdpSPL.xls	0	4.53942	4.95466	3.73903	2.25688	3.00727
z:\archiv\systems\2021\02\DO\CaBP1_2_DKO\non_inj\85434\DPOAE\15-25-56-DPOAEdpSPL.xls	0	0	0	0	0	0
z:\archiv\systems\2021\02\DO\CaBP1_2_DKO\non_inj\85434\DPOAE\15-28-6-DPOAEdpSPL.xls	0	0	0	0	0	0

[truncated: 10 more sheets: DP-13.3333, Noise-13.3333, NoiseStd-13.3333, DP-18.8889, Noise-18.8889, NoiseStd-18.8889, DP-26.6667, Noise-26.6667, NoiseStd-26.6667, Thresholds]
