# Supplementary material for: CaBP1 and 2 enable sustained CaV1.3 calcium currents and synaptic transmission in inner hair cells
Source: eLife. 2024 Dec 24;13:RP93646. doi: 10.7554/eLife.93646 (PMC11668525; doi:10.7554/eLife.93646)
Supplement: Figure 6—figure supplement 1—source data 2. [file elife-93646-fig6-figsupp1-data2.xlsx]

## Sheet: explanations
each following sheet has analyzed DPOAE data from individual mice in two groups called red (mutant) and black (wildtype)
DP sheets are the amplitude of the DPOAE. In Columns X (red) and Y (black), the thresholds are added.
Noise sheets are the amplitude of the noise floor
NoiseSTD are the standard deviation of the noise floor, not used in our final graphs.
the number behind is the F1 frequency at which the recordings were done.
line 1	line 1 has the stimulus intensities
line 2	mean has the average value of the nonzero values below
line 3	std has the SEM value of the nonzero values below
line 4	n is the number of nonzero values below
line 5	SEM is the SEM from the nonzero values below
lines 6 and below contain the data from individual animals along with the file name in which the original data was saved on our server (contact Nicola.Strenzke@med.uni-goettingen.de in case you need that original data, these are quite large amounts of data)
zero values indicate files in which no corresponding frequency/intensity combinations were applied, these were not included in the analysis above.

## Sheet: DP-4.7222
DPOAE	20	30	40	50	60	70		Mean	SEM	red		DPOAE	20	30	40	50	60	70		Mean	SEM	black	F1 Threshold (usually, F2, 10dB less, is shown	-4
Mean				-14.1681	-15.3654	-11.5808			0			Mean				-14.4402	-11.8012	-8.3339			0		76.887	74.1454
Std				1.66495	1.94659	3.64929			0			Std				2.40283	1.58505	5.92844			0		3.87746	6.09627
n	0	0	0	8	8	8			0			n	0	0	0	4	4	4			0		8	4
SEM	0	0	0	0.62929	0.735742	1.3793		-14.1681	0.62929			SEM	0	0	0	1.20141	0.792524	2.96422		-14.4402	1.20141		1.29249	3.04813
W:\archiv\systems\2021\09\SC\DPOAE_3Sep2021\22\16-34-15-DPOAE.xls	0	0	0	0	0	0		-15.3654	0.735742			W:\archiv\systems\2021\09\SC\DPOAE_28Sep2021\44\17-35-42-DPOAE.xls	0	0	0	-16.9216	-12.3449	-8.97812		-11.8012	0.792524		0	74.9388
W:\archiv\systems\2021\09\SC\DPOAE_3Sep2021\22\16-38-35-DPOAE.xls	0	0	0	-14.5294	-16.3716	-9.51561		-11.5808	1.3793			W:\archiv\systems\2021\09\SC\DPOAE_28Sep2021\44\17-41-11-DPOAE.xls	0	0	0	0	0	0		-8.3339	2.96422		75.4718	0
W:\archiv\systems\2021\09\SC\DPOAE_3Sep2021\22\16-44-43-DPOAE.xls	0	0	0	0	0	0						W:\archiv\systems\2021\09\SC\DPOAE_28Sep2021\45\15-14-56-DPOAE.xls	0	0	0	0	0	0					0	0
W:\archiv\systems\2021\09\SC\DPOAE_10Sep2021\23\16-11-5-DPOAE.xls	0	0	0	-13.6876	-16.0741	-11.0306						W:\archiv\systems\2021\09\SC\DPOAE_28Sep2021\45\15-9-13-DPOAE.xls	0	0	0	-15.862	-13.4956	-16.1444					76.9737	82.04
W:\archiv\systems\2021\09\SC\DPOAE_10Sep2021\23\16-17-41-DPOAE.xls	0	0	0	0	0	0						W:\archiv\systems\2021\10\SC\09Oct2021_DPOAE\49\17-28-33-DPOAE.xls	0	0	0	-11.6157	-11.6483	-6.14114					0	72.1248
W:\archiv\systems\2021\09\SC\DPOAE_16Sep2021\27\14-59-54-DPOAE.xls	0	0	0	-15.0351	-14.5088	-4.38356						W:\archiv\systems\2021\10\SC\09Oct2021_DPOAE\49\17-34-22-DPOAE.xls	0	0	0	0	0	0					70.3807	0
W:\archiv\systems\2021\09\SC\DPOAE_16Sep2021\27\15-1-32-DPOAE.xls	0	0	0	0	0	0						W:\archiv\systems\2021\08\SC\DPOAE22Aug2021\17\17-12-37-DPOAE.xls	0	0	0	-13.3616	-9.7162	-2.07194					0	67.4778
W:\archiv\systems\2021\09\SC\DPOAE_16Sep2021\27\15-7-20-DPOAE.xls	0	0	0	0	0	0						W:\archiv\systems\2021\08\SC\DPOAE22Aug2021\17\17-14-9-DPOAE.xls	0	0	0	0	0	0					0	0
W:\archiv\systems\2021\03\SC\DPOAE_11Mar2021\63\19-53-56-DPOAE.xls	0	0	0	-12.357	-16.9637	-10.4369						W:\archiv\systems\2021\08\SC\DPOAE22Aug2021\17\17-16-18-DPOAE.xls	0	0	0	0	0	0					76.3852	0
W:\archiv\systems\2021\03\SC\DPOAE_11Mar2021\63\19-58-40-DPOAE.xls	0	0	0	0	0	0						W:\archiv\systems\2021\08\SC\DPOAE22Aug2021\17\17-18-17-DPOAE.xls	0	0	0	0	0	0					0	0
W:\archiv\systems\2021\03\SC\10March2021DPOAE\64\17-18-20-DPOAE.xls	0	0	0	-15.904	0	-15.3741						W:\archiv\systems\2021\08\SC\DPOAE22Aug2021\17\17-20-10-DPOAE.xls	0	0	0	0	0	0					81.2772	0
W:\archiv\systems\2021\03\SC\10March2021DPOAE\64\17-19-24-DPOAE.xls	0	0	0	0	-15.9304	0						W:\archiv\systems\2021\08\SC\DPOAE22Aug2021\17\17-21-20-DPOAE.xls	0	0	0	0	0	0					0	0
W:\archiv\systems\2021\03\SC\10March2021DPOAE\64\17-24-10-DPOAE.xls	0	0	0	0	0	0																	0
W:\archiv\systems\2021\05\ND\CaBP_1_2\466\DPOAE\466_IO-Fct_12_22kHz_20_60dB_12-46-49-DPOAE.xls	0	0	0	0	0	0																	0
W:\archiv\systems\2021\05\ND\CaBP_1_2\466\DPOAE\466_IO-Fct_6_32kHz_40_60dB_12-49-42-DPOAE.xls	0	0	0	-12.3702	-13.163	-15.1387																	81.044
W:\archiv\systems\2021\05\ND\CaBP_1_2\468\DPOAE\468_12_16_22kHz_20_60dB_10-14-58-DPOAE.xls	0	0	0	0	0	0																	0
W:\archiv\systems\2021\05\ND\CaBP_1_2\468\DPOAE\468_6_8_32kHz_20_60dB_10-17-59-DPOAE.xls	0	0	0	-12.7146	-12.1085	-12.3841																	78.3151
W:\archiv\systems\2021\05\ND\CaBP_1_2\469\DPOAE\469_IO-Fct_12_22kHz_20_60dB_11-41-9-DPOAE.xls	0	0	0	0	0	0																	0
W:\archiv\systems\2021\05\ND\CaBP_1_2\469\DPOAE\469_IO-Fct_6_32kHz_40_60dB_11-44-12-DPOAE.xls	0	0	0	-16.7474	-17.8035	-14.3829																	80.2954

## Sheet: Noise-4.7222
DPOAE	20	30	40	50	60	70		Mean	SEM	red		DPOAE	20	30	40	50	60	70		Mean	SEM	black
Mean				-13.4991	-12.9727	-11.6239			0			Mean				-13.3678	-12.1786	-10.8966			0
Std				1.57899	1.21868	1.85287			0			Std				0.77906	1.15798	2.52501			0
n	0	0	0	8	8	8			0			n	0	0	0	4	4	4			0
SEM	0	0	0	0.596801	0.460618	0.70032		-13.4991	0.596801			SEM	0	0	0	0.38953	0.578989	1.26251		-13.3678	0.38953
W:\archiv\systems\2021\09\SC\DPOAE_3Sep2021\22\16-34-15-DPOAE.xls	0	0	0	0	0	0		-12.9727	0.460618			W:\archiv\systems\2021\09\SC\DPOAE_28Sep2021\44\17-35-42-DPOAE.xls	0	0	0	-12.9194	-13.3589	-13.2667		-12.1786	0.578989
W:\archiv\systems\2021\09\SC\DPOAE_3Sep2021\22\16-38-35-DPOAE.xls	0	0	0	-13.0279	-12.0417	-10.7888		-11.6239	0.70032			W:\archiv\systems\2021\09\SC\DPOAE_28Sep2021\44\17-41-11-DPOAE.xls	0	0	0	0	0	0		-10.8966	1.26251
W:\archiv\systems\2021\09\SC\DPOAE_3Sep2021\22\16-44-43-DPOAE.xls	0	0	0	0	0	0						W:\archiv\systems\2021\09\SC\DPOAE_28Sep2021\45\15-14-56-DPOAE.xls	0	0	0	0	0	0
W:\archiv\systems\2021\09\SC\DPOAE_10Sep2021\23\16-11-5-DPOAE.xls	0	0	0	-13.0644	-15.6566	-12.2943						W:\archiv\systems\2021\09\SC\DPOAE_28Sep2021\45\15-9-13-DPOAE.xls	0	0	0	-12.931	-12.7776	-12.867
W:\archiv\systems\2021\09\SC\DPOAE_10Sep2021\23\16-17-41-DPOAE.xls	0	0	0	0	0	0						W:\archiv\systems\2021\10\SC\09Oct2021_DPOAE\49\17-28-33-DPOAE.xls	0	0	0	-14.5305	-11.8755	-8.40411
W:\archiv\systems\2021\09\SC\DPOAE_16Sep2021\27\14-59-54-DPOAE.xls	0	0	0	-13.5263	-12.0375	-9.56251						W:\archiv\systems\2021\10\SC\09Oct2021_DPOAE\49\17-34-22-DPOAE.xls	0	0	0	0	0	0
W:\archiv\systems\2021\09\SC\DPOAE_16Sep2021\27\15-1-32-DPOAE.xls	0	0	0	0	0	0						W:\archiv\systems\2021\08\SC\DPOAE22Aug2021\17\17-12-37-DPOAE.xls	0	0	0	-13.0902	-10.7025	-9.04867
W:\archiv\systems\2021\09\SC\DPOAE_16Sep2021\27\15-7-20-DPOAE.xls	0	0	0	0	0	0						W:\archiv\systems\2021\08\SC\DPOAE22Aug2021\17\17-14-9-DPOAE.xls	0	0	0	0	0	0
W:\archiv\systems\2021\03\SC\DPOAE_11Mar2021\63\19-53-56-DPOAE.xls	0	0	0	-11.3473	-12.1105	-10.5515						W:\archiv\systems\2021\08\SC\DPOAE22Aug2021\17\17-16-18-DPOAE.xls	0	0	0	0	0	0
W:\archiv\systems\2021\03\SC\DPOAE_11Mar2021\63\19-58-40-DPOAE.xls	0	0	0	0	0	0						W:\archiv\systems\2021\08\SC\DPOAE22Aug2021\17\17-18-17-DPOAE.xls	0	0	0	0	0	0
W:\archiv\systems\2021\03\SC\10March2021DPOAE\64\17-18-20-DPOAE.xls	0	0	0	-14.9048	0	-11.8814						W:\archiv\systems\2021\08\SC\DPOAE22Aug2021\17\17-20-10-DPOAE.xls	0	0	0	0	0	0
W:\archiv\systems\2021\03\SC\10March2021DPOAE\64\17-19-24-DPOAE.xls	0	0	0	0	-12.4005	0						W:\archiv\systems\2021\08\SC\DPOAE22Aug2021\17\17-21-20-DPOAE.xls	0	0	0	0	0	0
W:\archiv\systems\2021\03\SC\10March2021DPOAE\64\17-24-10-DPOAE.xls	0	0	0	0	0	0
W:\archiv\systems\2021\05\ND\CaBP_1_2\466\DPOAE\466_IO-Fct_12_22kHz_20_60dB_12-46-49-DPOAE.xls	0	0	0	0	0	0
W:\archiv\systems\2021\05\ND\CaBP_1_2\466\DPOAE\466_IO-Fct_6_32kHz_40_60dB_12-49-42-DPOAE.xls	0	0	0	-15.3413	-13.2194	-14.7164
W:\archiv\systems\2021\05\ND\CaBP_1_2\468\DPOAE\468_12_16_22kHz_20_60dB_10-14-58-DPOAE.xls	0	0	0	0	0	0
W:\archiv\systems\2021\05\ND\CaBP_1_2\468\DPOAE\468_6_8_32kHz_20_60dB_10-17-59-DPOAE.xls	0	0	0	-11.5174	-13.5123	-13.5799
W:\archiv\systems\2021\05\ND\CaBP_1_2\469\DPOAE\469_IO-Fct_12_22kHz_20_60dB_11-41-9-DPOAE.xls	0	0	0	0	0	0
W:\archiv\systems\2021\05\ND\CaBP_1_2\469\DPOAE\469_IO-Fct_6_32kHz_40_60dB_11-44-12-DPOAE.xls	0	0	0	-15.2637	-12.8026	-9.61634

## Sheet: NoiseStd-4.7222
DPOAE	20	30	40	50	60	70		Mean	SEM	red		DPOAE	20	30	40	50	60	70		Mean	SEM	black
Mean				5.28062	5.65009	6.46964			0			Mean				5.32303	5.04234	6.14988			0
Std				1.14021	1.64237	1.82923			0			Std				1.53259	0.982823	1.34835			0
n	0	0	0	8	8	8			0			n	0	0	0	4	4	4			0
SEM	0	0	0	0.430961	0.620759	0.691382		5.28062	0.430961			SEM	0	0	0	0.766295	0.491412	0.674176		5.32303	0.766295
W:\archiv\systems\2021\09\SC\DPOAE_3Sep2021\22\16-34-15-DPOAE.xls	0	0	0	0	0	0		5.65009	0.620759			W:\archiv\systems\2021\09\SC\DPOAE_28Sep2021\44\17-35-42-DPOAE.xls	0	0	0	7.52313	6.30372	5.8349		5.04234	0.491412
W:\archiv\systems\2021\09\SC\DPOAE_3Sep2021\22\16-38-35-DPOAE.xls	0	0	0	4.77259	5.44758	5.40919		6.46964	0.691382			W:\archiv\systems\2021\09\SC\DPOAE_28Sep2021\44\17-41-11-DPOAE.xls	0	0	0	0	0	0		6.14988	0.674176
W:\archiv\systems\2021\09\SC\DPOAE_3Sep2021\22\16-44-43-DPOAE.xls	0	0	0	0	0	0						W:\archiv\systems\2021\09\SC\DPOAE_28Sep2021\45\15-14-56-DPOAE.xls	0	0	0	0	0	0
W:\archiv\systems\2021\09\SC\DPOAE_10Sep2021\23\16-11-5-DPOAE.xls	0	0	0	2.92771	2.9367	9.85017						W:\archiv\systems\2021\09\SC\DPOAE_28Sep2021\45\15-9-13-DPOAE.xls	0	0	0	4.77278	4.65484	8.13343
W:\archiv\systems\2021\09\SC\DPOAE_10Sep2021\23\16-17-41-DPOAE.xls	0	0	0	0	0	0						W:\archiv\systems\2021\10\SC\09Oct2021_DPOAE\49\17-28-33-DPOAE.xls	0	0	0	3.9774	5.22778	5.19638
W:\archiv\systems\2021\09\SC\DPOAE_16Sep2021\27\14-59-54-DPOAE.xls	0	0	0	5.84759	5.77534	6.00333						W:\archiv\systems\2021\10\SC\09Oct2021_DPOAE\49\17-34-22-DPOAE.xls	0	0	0	0	0	0
W:\archiv\systems\2021\09\SC\DPOAE_16Sep2021\27\15-1-32-DPOAE.xls	0	0	0	0	0	0						W:\archiv\systems\2021\08\SC\DPOAE22Aug2021\17\17-12-37-DPOAE.xls	0	0	0	5.01883	3.983	5.43483
W:\archiv\systems\2021\09\SC\DPOAE_16Sep2021\27\15-7-20-DPOAE.xls	0	0	0	0	0	0						W:\archiv\systems\2021\08\SC\DPOAE22Aug2021\17\17-14-9-DPOAE.xls	0	0	0	0	0	0
W:\archiv\systems\2021\03\SC\DPOAE_11Mar2021\63\19-53-56-DPOAE.xls	0	0	0	5.41	4.25095	4.69419						W:\archiv\systems\2021\08\SC\DPOAE22Aug2021\17\17-16-18-DPOAE.xls	0	0	0	0	0	0
W:\archiv\systems\2021\03\SC\DPOAE_11Mar2021\63\19-58-40-DPOAE.xls	0	0	0	0	0	0						W:\archiv\systems\2021\08\SC\DPOAE22Aug2021\17\17-18-17-DPOAE.xls	0	0	0	0	0	0
W:\archiv\systems\2021\03\SC\10March2021DPOAE\64\17-18-20-DPOAE.xls	0	0	0	6.34239	0	4.68188						W:\archiv\systems\2021\08\SC\DPOAE22Aug2021\17\17-20-10-DPOAE.xls	0	0	0	0	0	0
W:\archiv\systems\2021\03\SC\10March2021DPOAE\64\17-19-24-DPOAE.xls	0	0	0	0	7.07639	0						W:\archiv\systems\2021\08\SC\DPOAE22Aug2021\17\17-21-20-DPOAE.xls	0	0	0	0	0	0
W:\archiv\systems\2021\03\SC\10March2021DPOAE\64\17-24-10-DPOAE.xls	0	0	0	0	0	0
W:\archiv\systems\2021\05\ND\CaBP_1_2\466\DPOAE\466_IO-Fct_12_22kHz_20_60dB_12-46-49-DPOAE.xls	0	0	0	0	0	0
W:\archiv\systems\2021\05\ND\CaBP_1_2\466\DPOAE\466_IO-Fct_6_32kHz_40_60dB_12-49-42-DPOAE.xls	0	0	0	4.91212	4.82386	5.56449
W:\archiv\systems\2021\05\ND\CaBP_1_2\468\DPOAE\468_12_16_22kHz_20_60dB_10-14-58-DPOAE.xls	0	0	0	0	0	0
W:\archiv\systems\2021\05\ND\CaBP_1_2\468\DPOAE\468_6_8_32kHz_20_60dB_10-17-59-DPOAE.xls	0	0	0	6.57422	7.86028	7.5942
W:\archiv\systems\2021\05\ND\CaBP_1_2\469\DPOAE\469_IO-Fct_12_22kHz_20_60dB_11-41-9-DPOAE.xls	0	0	0	0	0	0
W:\archiv\systems\2021\05\ND\CaBP_1_2\469\DPOAE\469_IO-Fct_6_32kHz_40_60dB_11-44-12-DPOAE.xls	0	0	0	5.45835	7.0296	7.95969

## Sheet: DP-6.6667
DPOAE	20	30	40	50	60	70		Mean	SEM	red		DPOAE	20	30	40	50	60	70		Mean	SEM	black	F1 Threshold (usually, F2, 10dB less, is shown	-4
Mean				-10.571	-4.19469	6.04421			0			Mean				-5.799	1.00366	13.7121			0		60.6357	59.8104
Std				3.94371	8.24443	9.37575			0			Std				7.15248	8.49536	4.97912			0		8.22282	4.8357
n	0	0	0	8	8	8			0			n	0	0	0	4	4	4			0		8	2
SEM	0	0	0	1.49058	3.1161	3.5437		-10.571	1.49058			SEM	0	0	0	3.57624	4.24768	2.48956		-5.799	3.57624		2.74094	3.41936
W:\archiv\systems\2021\09\SC\DPOAE_3Sep2021\22\16-34-15-DPOAE.xls	0	0	0	0	0	0		-4.19469	3.1161			W:\archiv\systems\2021\09\SC\DPOAE_28Sep2021\44\17-35-42-DPOAE.xls	0	0	0	-10.6251	-0.258863	10.3687		1.00366	4.24768		0	56.391
W:\archiv\systems\2021\09\SC\DPOAE_3Sep2021\22\16-38-35-DPOAE.xls	0	0	0	-5.26011	3.53546	19.5134		6.04421	3.5437			W:\archiv\systems\2021\09\SC\DPOAE_28Sep2021\44\17-41-11-DPOAE.xls	0	0	0	0	0	0		13.7121	2.48956		51.4327	0
W:\archiv\systems\2021\09\SC\DPOAE_3Sep2021\22\16-44-43-DPOAE.xls	0	0	0	0	0	0						W:\archiv\systems\2021\09\SC\DPOAE_28Sep2021\45\15-14-56-DPOAE.xls	0	0	0	0	0	0					0	0
W:\archiv\systems\2021\09\SC\DPOAE_10Sep2021\23\16-11-5-DPOAE.xls	0	0	0	-11.0526	3.91661	13.1989						W:\archiv\systems\2021\09\SC\DPOAE_28Sep2021\45\15-9-13-DPOAE.xls	0	0	0	-13.2196	-10.0062	8.59035					54.7114	63.2297
W:\archiv\systems\2021\09\SC\DPOAE_10Sep2021\23\16-17-41-DPOAE.xls	0	0	0	0	0	0						W:\archiv\systems\2021\10\SC\09Oct2021_DPOAE\49\17-28-33-DPOAE.xls	0	0	0	0.57741	4.10703	18.6979					0	0
W:\archiv\systems\2021\09\SC\DPOAE_16Sep2021\27\14-59-54-DPOAE.xls	0	0	0	-4.38293	3.35254	10.5719						W:\archiv\systems\2021\10\SC\09Oct2021_DPOAE\49\17-34-22-DPOAE.xls	0	0	0	0	0	0					50.495	0
W:\archiv\systems\2021\09\SC\DPOAE_16Sep2021\27\15-1-32-DPOAE.xls	0	0	0	0	0	0						W:\archiv\systems\2021\08\SC\DPOAE22Aug2021\17\17-12-37-DPOAE.xls	0	0	0	0	0	0					0	0
W:\archiv\systems\2021\09\SC\DPOAE_16Sep2021\27\15-7-20-DPOAE.xls	0	0	0	0	0	0						W:\archiv\systems\2021\08\SC\DPOAE22Aug2021\17\17-14-9-DPOAE.xls	0	0	0	0.0712304	10.1727	17.1915					0	49
W:\archiv\systems\2021\03\SC\DPOAE_11Mar2021\63\19-53-56-DPOAE.xls	0	0	0	-9.86831	-0.781225	11.5393						W:\archiv\systems\2021\08\SC\DPOAE22Aug2021\17\17-16-18-DPOAE.xls	0	0	0	0	0	0					56.4579	0
W:\archiv\systems\2021\03\SC\DPOAE_11Mar2021\63\19-58-40-DPOAE.xls	0	0	0	0	0	0						W:\archiv\systems\2021\08\SC\DPOAE22Aug2021\17\17-18-17-DPOAE.xls	0	0	0	0	0	0					0	0
W:\archiv\systems\2021\03\SC\10March2021DPOAE\64\17-18-20-DPOAE.xls	0	0	0	-14.2717	0	1.81652						W:\archiv\systems\2021\08\SC\DPOAE22Aug2021\17\17-20-10-DPOAE.xls	0	0	0	0	0	0					62.7692	0
W:\archiv\systems\2021\03\SC\10March2021DPOAE\64\17-19-24-DPOAE.xls	0	0	0	0	-8.90443	0						W:\archiv\systems\2021\08\SC\DPOAE22Aug2021\17\17-21-20-DPOAE.xls	0	0	0	0	0	0					0	0
W:\archiv\systems\2021\03\SC\10March2021DPOAE\64\17-24-10-DPOAE.xls	0	0	0	0	0	0																	0
W:\archiv\systems\2021\05\ND\CaBP_1_2\466\DPOAE\466_IO-Fct_12_22kHz_20_60dB_12-46-49-DPOAE.xls	0	0	0	0	0	0																	0
W:\archiv\systems\2021\05\ND\CaBP_1_2\466\DPOAE\466_IO-Fct_6_32kHz_40_60dB_12-49-42-DPOAE.xls	0	0	0	-14.4352	-12.621	-6.97426																	72.9514
W:\archiv\systems\2021\05\ND\CaBP_1_2\468\DPOAE\468_12_16_22kHz_20_60dB_10-14-58-DPOAE.xls	0	0	0	0	0	0																	0
W:\archiv\systems\2021\05\ND\CaBP_1_2\468\DPOAE\468_6_8_32kHz_20_60dB_10-17-59-DPOAE.xls	0	0	0	-11.1672	-4.13325	4.5826																	60.1529
W:\archiv\systems\2021\05\ND\CaBP_1_2\469\DPOAE\469_IO-Fct_12_22kHz_20_60dB_11-41-9-DPOAE.xls	0	0	0	0	0	0																	0
W:\archiv\systems\2021\05\ND\CaBP_1_2\469\DPOAE\469_IO-Fct_6_32kHz_40_60dB_11-44-12-DPOAE.xls	0	0	0	-14.1296	-17.9222	-5.89468																	71.8803

## Sheet: Noise-6.6667
DPOAE	20	30	40	50	60	70		Mean	SEM	red		DPOAE	20	30	40	50	60	70		Mean	SEM	black
Mean				-11.4938	-9.48948	-1.99827			0			Mean				-11.9839	-8.41475	-0.447061			0
Std				1.28417	3.2418	6.76512			0			Std				1.48638	2.89035	4.55347			0
n	0	0	0	8	8	8			0			n	0	0	0	4	4	4			0
SEM	0	0	0	0.485371	1.22528	2.55698		-11.4938	0.485371			SEM	0	0	0	0.743191	1.44518	2.27673		-11.9839	0.743191
W:\archiv\systems\2021\09\SC\DPOAE_3Sep2021\22\16-34-15-DPOAE.xls	0	0	0	0	0	0		-9.48948	1.22528			W:\archiv\systems\2021\09\SC\DPOAE_28Sep2021\44\17-35-42-DPOAE.xls	0	0	0	-13.3526	-12.187	-3.68265		-8.41475	1.44518
W:\archiv\systems\2021\09\SC\DPOAE_3Sep2021\22\16-38-35-DPOAE.xls	0	0	0	-11.1234	-5.32011	7.01903		-1.99827	2.55698			W:\archiv\systems\2021\09\SC\DPOAE_28Sep2021\44\17-41-11-DPOAE.xls	0	0	0	0	0	0		-0.447061	2.27673
W:\archiv\systems\2021\09\SC\DPOAE_3Sep2021\22\16-44-43-DPOAE.xls	0	0	0	0	0	0						W:\archiv\systems\2021\09\SC\DPOAE_28Sep2021\45\15-14-56-DPOAE.xls	0	0	0	0	0	0
W:\archiv\systems\2021\09\SC\DPOAE_10Sep2021\23\16-11-5-DPOAE.xls	0	0	0	-12.0038	-6.90711	1.49466						W:\archiv\systems\2021\09\SC\DPOAE_28Sep2021\45\15-9-13-DPOAE.xls	0	0	0	-10.8592	-7.75293	-4.95635
W:\archiv\systems\2021\09\SC\DPOAE_10Sep2021\23\16-17-41-DPOAE.xls	0	0	0	0	0	0						W:\archiv\systems\2021\10\SC\09Oct2021_DPOAE\49\17-28-33-DPOAE.xls	0	0	0	-10.5466	-5.19261	4.26438
W:\archiv\systems\2021\09\SC\DPOAE_16Sep2021\27\14-59-54-DPOAE.xls	0	0	0	-8.60595	-5.6103	5.4613						W:\archiv\systems\2021\10\SC\09Oct2021_DPOAE\49\17-34-22-DPOAE.xls	0	0	0	0	0	0
W:\archiv\systems\2021\09\SC\DPOAE_16Sep2021\27\15-1-32-DPOAE.xls	0	0	0	0	0	0						W:\archiv\systems\2021\08\SC\DPOAE22Aug2021\17\17-12-37-DPOAE.xls	0	0	0	0	0	0
W:\archiv\systems\2021\09\SC\DPOAE_16Sep2021\27\15-7-20-DPOAE.xls	0	0	0	0	0	0						W:\archiv\systems\2021\08\SC\DPOAE22Aug2021\17\17-14-9-DPOAE.xls	0	0	0	-13.1771	-8.52647	2.58638
W:\archiv\systems\2021\03\SC\DPOAE_11Mar2021\63\19-53-56-DPOAE.xls	0	0	0	-11.55	-10.5306	-1.63913						W:\archiv\systems\2021\08\SC\DPOAE22Aug2021\17\17-16-18-DPOAE.xls	0	0	0	0	0	0
W:\archiv\systems\2021\03\SC\DPOAE_11Mar2021\63\19-58-40-DPOAE.xls	0	0	0	0	0	0						W:\archiv\systems\2021\08\SC\DPOAE22Aug2021\17\17-18-17-DPOAE.xls	0	0	0	0	0	0
W:\archiv\systems\2021\03\SC\10March2021DPOAE\64\17-18-20-DPOAE.xls	0	0	0	-12.8528	0	-6.76435						W:\archiv\systems\2021\08\SC\DPOAE22Aug2021\17\17-20-10-DPOAE.xls	0	0	0	0	0	0
W:\archiv\systems\2021\03\SC\10March2021DPOAE\64\17-19-24-DPOAE.xls	0	0	0	0	-11.609	0						W:\archiv\systems\2021\08\SC\DPOAE22Aug2021\17\17-21-20-DPOAE.xls	0	0	0	0	0	0
W:\archiv\systems\2021\03\SC\10March2021DPOAE\64\17-24-10-DPOAE.xls	0	0	0	0	0	0
W:\archiv\systems\2021\05\ND\CaBP_1_2\466\DPOAE\466_IO-Fct_12_22kHz_20_60dB_12-46-49-DPOAE.xls	0	0	0	0	0	0
W:\archiv\systems\2021\05\ND\CaBP_1_2\466\DPOAE\466_IO-Fct_6_32kHz_40_60dB_12-49-42-DPOAE.xls	0	0	0	-12.3204	-11.361	-7.19194
W:\archiv\systems\2021\05\ND\CaBP_1_2\468\DPOAE\468_12_16_22kHz_20_60dB_10-14-58-DPOAE.xls	0	0	0	0	0	0
W:\archiv\systems\2021\05\ND\CaBP_1_2\468\DPOAE\468_6_8_32kHz_20_60dB_10-17-59-DPOAE.xls	0	0	0	-12.0163	-10.0851	-1.36772
W:\archiv\systems\2021\05\ND\CaBP_1_2\469\DPOAE\469_IO-Fct_12_22kHz_20_60dB_11-41-9-DPOAE.xls	0	0	0	0	0	0
W:\archiv\systems\2021\05\ND\CaBP_1_2\469\DPOAE\469_IO-Fct_6_32kHz_40_60dB_11-44-12-DPOAE.xls	0	0	0	-11.4777	-14.4926	-12.998

## Sheet: NoiseStd-6.6667
DPOAE	20	30	40	50	60	70		Mean	SEM	red		DPOAE	20	30	40	50	60	70		Mean	SEM	black
Mean				4.90324	4.17036	2.88794			0			Mean				5.56829	3.42182	2.23206			0
Std				1.00123	1.61314	1.07843			0			Std				2.21265	1.19037	0.129598			0
n	0	0	0	8	8	8			0			n	0	0	0	4	4	4			0
SEM	0	0	0	0.378429	0.609709	0.407607		4.90324	0.378429			SEM	0	0	0	1.10633	0.595187	0.0647991		5.56829	1.10633
W:\archiv\systems\2021\09\SC\DPOAE_3Sep2021\22\16-34-15-DPOAE.xls	0	0	0	0	0	0		4.17036	0.609709			W:\archiv\systems\2021\09\SC\DPOAE_28Sep2021\44\17-35-42-DPOAE.xls	0	0	0	6.88021	3.35637	2.12974		3.42182	0.595187
W:\archiv\systems\2021\09\SC\DPOAE_3Sep2021\22\16-38-35-DPOAE.xls	0	0	0	3.97351	1.69829	1.787		2.88794	0.407607			W:\archiv\systems\2021\09\SC\DPOAE_28Sep2021\44\17-41-11-DPOAE.xls	0	0	0	0	0	0		2.23206	0.0647991
W:\archiv\systems\2021\09\SC\DPOAE_3Sep2021\22\16-44-43-DPOAE.xls	0	0	0	0	0	0						W:\archiv\systems\2021\09\SC\DPOAE_28Sep2021\45\15-14-56-DPOAE.xls	0	0	0	0	0	0
W:\archiv\systems\2021\09\SC\DPOAE_10Sep2021\23\16-11-5-DPOAE.xls	0	0	0	6.20426	2.32229	1.9816						W:\archiv\systems\2021\09\SC\DPOAE_28Sep2021\45\15-9-13-DPOAE.xls	0	0	0	8.00393	3.95649	2.1698
W:\archiv\systems\2021\09\SC\DPOAE_10Sep2021\23\16-17-41-DPOAE.xls	0	0	0	0	0	0						W:\archiv\systems\2021\10\SC\09Oct2021_DPOAE\49\17-28-33-DPOAE.xls	0	0	0	3.61746	1.79963	2.42041
W:\archiv\systems\2021\09\SC\DPOAE_16Sep2021\27\14-59-54-DPOAE.xls	0	0	0	5.27699	3.77682	1.83904						W:\archiv\systems\2021\10\SC\09Oct2021_DPOAE\49\17-34-22-DPOAE.xls	0	0	0	0	0	0
W:\archiv\systems\2021\09\SC\DPOAE_16Sep2021\27\15-1-32-DPOAE.xls	0	0	0	0	0	0						W:\archiv\systems\2021\08\SC\DPOAE22Aug2021\17\17-12-37-DPOAE.xls	0	0	0	0	0	0
W:\archiv\systems\2021\09\SC\DPOAE_16Sep2021\27\15-7-20-DPOAE.xls	0	0	0	0	0	0						W:\archiv\systems\2021\08\SC\DPOAE22Aug2021\17\17-14-9-DPOAE.xls	0	0	0	3.77154	4.57478	2.2083
W:\archiv\systems\2021\03\SC\DPOAE_11Mar2021\63\19-53-56-DPOAE.xls	0	0	0	5.89356	4.36091	2.54008						W:\archiv\systems\2021\08\SC\DPOAE22Aug2021\17\17-16-18-DPOAE.xls	0	0	0	0	0	0
W:\archiv\systems\2021\03\SC\DPOAE_11Mar2021\63\19-58-40-DPOAE.xls	0	0	0	0	0	0						W:\archiv\systems\2021\08\SC\DPOAE22Aug2021\17\17-18-17-DPOAE.xls	0	0	0	0	0	0
W:\archiv\systems\2021\03\SC\10March2021DPOAE\64\17-18-20-DPOAE.xls	0	0	0	3.16108	0	2.98563						W:\archiv\systems\2021\08\SC\DPOAE22Aug2021\17\17-20-10-DPOAE.xls	0	0	0	0	0	0
W:\archiv\systems\2021\03\SC\10March2021DPOAE\64\17-19-24-DPOAE.xls	0	0	0	0	6.68739	0						W:\archiv\systems\2021\08\SC\DPOAE22Aug2021\17\17-21-20-DPOAE.xls	0	0	0	0	0	0
W:\archiv\systems\2021\03\SC\10March2021DPOAE\64\17-24-10-DPOAE.xls	0	0	0	0	0	0
W:\archiv\systems\2021\05\ND\CaBP_1_2\466\DPOAE\466_IO-Fct_12_22kHz_20_60dB_12-46-49-DPOAE.xls	0	0	0	0	0	0
W:\archiv\systems\2021\05\ND\CaBP_1_2\466\DPOAE\466_IO-Fct_6_32kHz_40_60dB_12-49-42-DPOAE.xls	0	0	0	5.34759	4.67754	4.33057
W:\archiv\systems\2021\05\ND\CaBP_1_2\468\DPOAE\468_12_16_22kHz_20_60dB_10-14-58-DPOAE.xls	0	0	0	0	0	0
W:\archiv\systems\2021\05\ND\CaBP_1_2\468\DPOAE\468_6_8_32kHz_20_60dB_10-17-59-DPOAE.xls	0	0	0	4.60874	5.54503	3.09217
W:\archiv\systems\2021\05\ND\CaBP_1_2\469\DPOAE\469_IO-Fct_12_22kHz_20_60dB_11-41-9-DPOAE.xls	0	0	0	0	0	0
W:\archiv\systems\2021\05\ND\CaBP_1_2\469\DPOAE\469_IO-Fct_6_32kHz_40_60dB_11-44-12-DPOAE.xls	0	0	0	4.76017	4.29462	4.54742

## Sheet: DP-9.4444
DPOAE	20	30	40	50	60	70		Mean	SEM	red		DPOAE	20	30	40	50	60	70		Mean	SEM	black	F1 Threshold (usually, F2, 10dB less, is shown	-4
Mean	-10.7856	-4.28438	6.74305	14.2879	15.8059	23.2376		-10.7856	7.99844			Mean	-2.56058	9.95198	18.5954	17.6252	20.9196	30.0961		-2.56058	4.06623		32.0999	22.283
Std	11.3115	10.6334	9.01734	6.59252	5.03224	5.38354		-4.28438	4.01906			Std	8.13246	9.54575	5.59624	3.9378	6.71139	7.09251		9.95198	4.77288		7.85512	4.73372
n	3	8	8	8	8	8		6.74305	3.40824			n	4	4	4	4	4	4		18.5954	2.79812		7	4
SEM	7.99844	4.01906	3.40824	2.49174	1.90201	2.03479		14.2879	2.49174			SEM	4.06623	4.77288	2.79812	1.9689	3.3557	3.54625		17.6252	1.9689		2.96896	2.36686
W:\archiv\systems\2021\09\SC\DPOAE_3Sep2021\22\16-34-15-DPOAE.xls	0	0	0	0	0	0		15.8059	1.90201			W:\archiv\systems\2021\09\SC\DPOAE_28Sep2021\44\17-35-42-DPOAE.xls	0	0	0	0	0	0		20.9196	3.3557		0	0
W:\archiv\systems\2021\09\SC\DPOAE_3Sep2021\22\16-38-35-DPOAE.xls	0	0	0	0	0	0		23.2376	2.03479			W:\archiv\systems\2021\09\SC\DPOAE_28Sep2021\44\17-41-11-DPOAE.xls	-7.46894	9.09765	19.0482	21.6767	20.3479	30.3357		30.0961	3.54625		0	22.0939
W:\archiv\systems\2021\09\SC\DPOAE_3Sep2021\22\16-44-43-DPOAE.xls	-12.9943	2.28868	12.9071	18.4283	17.0142	27.2476						W:\archiv\systems\2021\09\SC\DPOAE_28Sep2021\45\15-14-56-DPOAE.xls	-11.4355	-3.20872	10.5752	12.3598	11.8516	20.048					25.8852	29.0382
W:\archiv\systems\2021\09\SC\DPOAE_10Sep2021\23\16-11-5-DPOAE.xls	0	0	0	0	0	0						W:\archiv\systems\2021\09\SC\DPOAE_28Sep2021\45\15-9-13-DPOAE.xls	0	0	0	0	0	0					0	0
W:\archiv\systems\2021\09\SC\DPOAE_10Sep2021\23\16-17-41-DPOAE.xls	-20.8299	-12.8743	-6.67768	6.14424	15.9793	12.4593						W:\archiv\systems\2021\10\SC\09Oct2021_DPOAE\49\17-28-33-DPOAE.xls	0	0	0	0	0	0					42.0884	0
W:\archiv\systems\2021\09\SC\DPOAE_16Sep2021\27\14-59-54-DPOAE.xls	0	0	0	0	0	0						W:\archiv\systems\2021\10\SC\09Oct2021_DPOAE\49\17-34-22-DPOAE.xls	3.79947	16.1786	21.7488	19.1384	23.9913	34.0558					0	19
W:\archiv\systems\2021\09\SC\DPOAE_16Sep2021\27\15-1-32-DPOAE.xls	0	0	0	0	0	0						W:\archiv\systems\2021\08\SC\DPOAE22Aug2021\17\17-12-37-DPOAE.xls	0	0	0	0	0	0					0	0
W:\archiv\systems\2021\09\SC\DPOAE_16Sep2021\27\15-7-20-DPOAE.xls	1.46734	13.9831	19.6432	13.4671	17.7934	22.559						W:\archiv\systems\2021\08\SC\DPOAE22Aug2021\17\17-14-9-DPOAE.xls	0	0	0	0	0	0					19	0
W:\archiv\systems\2021\03\SC\DPOAE_11Mar2021\63\19-53-56-DPOAE.xls	0	0	0	0	0	0						W:\archiv\systems\2021\08\SC\DPOAE22Aug2021\17\17-16-18-DPOAE.xls	4.86265	17.7404	23.0092	17.3258	27.4875	35.9449					0	19
W:\archiv\systems\2021\03\SC\DPOAE_11Mar2021\63\19-58-40-DPOAE.xls	0	4.83737	16.3237	26.9636	24.9245	31.2524						W:\archiv\systems\2021\08\SC\DPOAE22Aug2021\17\17-18-17-DPOAE.xls	0	0	0	0	0	0					0	0
W:\archiv\systems\2021\03\SC\10March2021DPOAE\64\17-18-20-DPOAE.xls	0	0	0	0	0	0						W:\archiv\systems\2021\08\SC\DPOAE22Aug2021\17\17-20-10-DPOAE.xls	0	0	0	0	0	0					0	0
W:\archiv\systems\2021\03\SC\10March2021DPOAE\64\17-19-24-DPOAE.xls	0	0	0	0	0	0						W:\archiv\systems\2021\08\SC\DPOAE22Aug2021\17\17-21-20-DPOAE.xls	0	0	0	0	0	0					0	0
W:\archiv\systems\2021\03\SC\10March2021DPOAE\64\17-24-10-DPOAE.xls	0	-4.308	5.81214	8.77934	13.0174	21.8224																	30.3043
W:\archiv\systems\2021\05\ND\CaBP_1_2\466\DPOAE\466_IO-Fct_12_22kHz_20_60dB_12-46-49-DPOAE.xls	0	-15.0653	-1.98324	11.467	7.23825	21.9592																	38.4584
W:\archiv\systems\2021\05\ND\CaBP_1_2\466\DPOAE\466_IO-Fct_6_32kHz_40_60dB_12-49-42-DPOAE.xls	0	0	0	0	0	0																	0
W:\archiv\systems\2021\05\ND\CaBP_1_2\468\DPOAE\468_12_16_22kHz_20_60dB_10-14-58-DPOAE.xls	0	-7.36984	4.38652	17.7676	13.3888	24.4259																	32.8664
W:\archiv\systems\2021\05\ND\CaBP_1_2\468\DPOAE\468_6_8_32kHz_20_60dB_10-17-59-DPOAE.xls	0	0	0	0	0	0																	0
W:\archiv\systems\2021\05\ND\CaBP_1_2\469\DPOAE\469_IO-Fct_12_22kHz_20_60dB_11-41-9-DPOAE.xls	0	-15.7666	3.5327	11.2863	17.0913	24.1751																	36.0969
W:\archiv\systems\2021\05\ND\CaBP_1_2\469\DPOAE\469_IO-Fct_6_32kHz_40_60dB_11-44-12-DPOAE.xls	0	0	0	0	0	0																	0

## Sheet: Noise-9.4444
DPOAE	20	30	40	50	60	70		Mean	SEM	red		DPOAE	20	30	40	50	60	70		Mean	SEM	black
Mean	-12.921	-14.525	-10.2626	-6.41389	-5.165	1.94997		-12.921	0.839429			Mean	-14.3547	-8.70807	-2.18406	-4.73601	-0.123546	9.32083		-14.3547	0.919564
Std	1.18713	3.49931	4.91095	5.26725	3.53482	5.0061		-14.525	1.32261			Std	1.83913	5.28679	5.07385	2.13368	6.88774	6.18303		-8.70807	2.6434
n	3	8	8	8	8	8		-10.2626	1.85616			n	4	4	4	4	4	4		-2.18406	2.53692
SEM	0.839429	1.32261	1.85616	1.99083	1.33603	1.89213		-6.41389	1.99083			SEM	0.919564	2.6434	2.53692	1.06684	3.44387	3.09151		-4.73601	1.06684
W:\archiv\systems\2021\09\SC\DPOAE_3Sep2021\22\16-34-15-DPOAE.xls	0	0	0	0	0	0		-5.165	1.33603			W:\archiv\systems\2021\09\SC\DPOAE_28Sep2021\44\17-35-42-DPOAE.xls	0	0	0	0	0	0		-0.123546	3.44387
W:\archiv\systems\2021\09\SC\DPOAE_3Sep2021\22\16-38-35-DPOAE.xls	0	0	0	0	0	0		1.94997	1.89213			W:\archiv\systems\2021\09\SC\DPOAE_28Sep2021\44\17-41-11-DPOAE.xls	-16.1627	-10.6663	-1.46975	-3.50257	-4.24199	8.04038		9.32083	3.09151
W:\archiv\systems\2021\09\SC\DPOAE_3Sep2021\22\16-44-43-DPOAE.xls	-13.6183	-12.2346	-6.87047	-3.07383	-4.01942	4.21372						W:\archiv\systems\2021\09\SC\DPOAE_28Sep2021\45\15-14-56-DPOAE.xls	-14.5706	-15.2583	-9.51147	-7.1024	-7.36166	1.20197
W:\archiv\systems\2021\09\SC\DPOAE_10Sep2021\23\16-11-5-DPOAE.xls	0	0	0	0	0	0						W:\archiv\systems\2021\09\SC\DPOAE_28Sep2021\45\15-9-13-DPOAE.xls	0	0	0	0	0	0
W:\archiv\systems\2021\09\SC\DPOAE_10Sep2021\23\16-17-41-DPOAE.xls	-13.5944	-18.0595	-14.8273	-11.1952	-3.50638	-4.0545						W:\archiv\systems\2021\10\SC\09Oct2021_DPOAE\49\17-28-33-DPOAE.xls	0	0	0	0	0	0
W:\archiv\systems\2021\09\SC\DPOAE_16Sep2021\27\14-59-54-DPOAE.xls	0	0	0	0	0	0						W:\archiv\systems\2021\10\SC\09Oct2021_DPOAE\49\17-34-22-DPOAE.xls	-14.8893	-3.7782	0.359484	-5.88633	3.495	12.8038
W:\archiv\systems\2021\09\SC\DPOAE_16Sep2021\27\15-1-32-DPOAE.xls	0	0	0	0	0	0						W:\archiv\systems\2021\08\SC\DPOAE22Aug2021\17\17-12-37-DPOAE.xls	0	0	0	0	0	0
W:\archiv\systems\2021\09\SC\DPOAE_16Sep2021\27\15-7-20-DPOAE.xls	-11.5503	-7.31295	-2.75697	-8.90924	-5.92201	4.32572						W:\archiv\systems\2021\08\SC\DPOAE22Aug2021\17\17-14-9-DPOAE.xls	0	0	0	0	0	0
W:\archiv\systems\2021\03\SC\DPOAE_11Mar2021\63\19-53-56-DPOAE.xls	0	0	0	0	0	0						W:\archiv\systems\2021\08\SC\DPOAE22Aug2021\17\17-16-18-DPOAE.xls	-11.7962	-5.12945	1.88548	-2.45274	7.61447	15.2372
W:\archiv\systems\2021\03\SC\DPOAE_11Mar2021\63\19-58-40-DPOAE.xls	0	-13.2634	-5.34234	2.93477	2.19655	11.3437						W:\archiv\systems\2021\08\SC\DPOAE22Aug2021\17\17-18-17-DPOAE.xls	0	0	0	0	0	0
W:\archiv\systems\2021\03\SC\10March2021DPOAE\64\17-18-20-DPOAE.xls	0	0	0	0	0	0						W:\archiv\systems\2021\08\SC\DPOAE22Aug2021\17\17-20-10-DPOAE.xls	0	0	0	0	0	0
W:\archiv\systems\2021\03\SC\10March2021DPOAE\64\17-19-24-DPOAE.xls	0	0	0	0	0	0						W:\archiv\systems\2021\08\SC\DPOAE22Aug2021\17\17-21-20-DPOAE.xls	0	0	0	0	0	0
W:\archiv\systems\2021\03\SC\10March2021DPOAE\64\17-24-10-DPOAE.xls	0	-16.788	-9.47478	-8.1831	-6.0487	-3.01706
W:\archiv\systems\2021\05\ND\CaBP_1_2\466\DPOAE\466_IO-Fct_12_22kHz_20_60dB_12-46-49-DPOAE.xls	0	-16.7682	-16.3878	-8.01439	-9.30002	-1.59965
W:\archiv\systems\2021\05\ND\CaBP_1_2\466\DPOAE\466_IO-Fct_6_32kHz_40_60dB_12-49-42-DPOAE.xls	0	0	0	0	0	0
W:\archiv\systems\2021\05\ND\CaBP_1_2\468\DPOAE\468_12_16_22kHz_20_60dB_10-14-58-DPOAE.xls	0	-15.3819	-13.6051	-2.01339	-8.1084	3.41289
W:\archiv\systems\2021\05\ND\CaBP_1_2\468\DPOAE\468_6_8_32kHz_20_60dB_10-17-59-DPOAE.xls	0	0	0	0	0	0
W:\archiv\systems\2021\05\ND\CaBP_1_2\469\DPOAE\469_IO-Fct_12_22kHz_20_60dB_11-41-9-DPOAE.xls	0	-16.3918	-12.8364	-12.8568	-6.61159	0.974917
W:\archiv\systems\2021\05\ND\CaBP_1_2\469\DPOAE\469_IO-Fct_6_32kHz_40_60dB_11-44-12-DPOAE.xls	0	0	0	0	0	0

## Sheet: NoiseStd-9.4444
DPOAE	20	30	40	50	60	70		Mean	SEM	red		DPOAE	20	30	40	50	60	70		Mean	SEM	black
Mean	4.88516	4.56738	4.79603	4.34706	4.79992	3.52904		4.88516	0.331884			Mean	5.79642	4.40006	4.79376	3.743	3.79841	3.27911		5.79642	1.51755
Std	0.469354	0.952751	1.58002	1.79991	1.26953	0.696666		4.56738	0.360106			Std	3.0351	1.25239	1.07008	0.995716	1.47017	0.924296		4.40006	0.626193
n	3	8	8	8	8	8		4.79603	0.59719			n	4	4	4	4	4	4		4.79376	0.535038
SEM	0.331884	0.360106	0.59719	0.680303	0.479838	0.263315		4.34706	0.680303			SEM	1.51755	0.626193	0.535038	0.497858	0.735085	0.462148		3.743	0.497858
W:\archiv\systems\2021\09\SC\DPOAE_3Sep2021\22\16-34-15-DPOAE.xls	0	0	0	0	0	0		4.79992	0.479838			W:\archiv\systems\2021\09\SC\DPOAE_28Sep2021\44\17-35-42-DPOAE.xls	0	0	0	0	0	0		3.79841	0.735085
W:\archiv\systems\2021\09\SC\DPOAE_3Sep2021\22\16-38-35-DPOAE.xls	0	0	0	0	0	0		3.52904	0.263315			W:\archiv\systems\2021\09\SC\DPOAE_28Sep2021\44\17-41-11-DPOAE.xls	9.13539	3.8918	4.48724	2.97649	2.31969	2.73533		3.27911	0.462148
W:\archiv\systems\2021\09\SC\DPOAE_3Sep2021\22\16-44-43-DPOAE.xls	4.71381	4.1664	3.14133	3.31281	4.31923	4.01404						W:\archiv\systems\2021\09\SC\DPOAE_28Sep2021\45\15-14-56-DPOAE.xls	3.79123	5.14462	6.18327	4.98797	5.79703	4.65077
W:\archiv\systems\2021\09\SC\DPOAE_10Sep2021\23\16-11-5-DPOAE.xls	0	0	0	0	0	0						W:\archiv\systems\2021\09\SC\DPOAE_28Sep2021\45\15-9-13-DPOAE.xls	0	0	0	0	0	0
W:\archiv\systems\2021\09\SC\DPOAE_10Sep2021\23\16-17-41-DPOAE.xls	5.41611	5.39257	4.79069	3.84624	4.69134	3.71136						W:\archiv\systems\2021\10\SC\09Oct2021_DPOAE\49\17-28-33-DPOAE.xls	0	0	0	0	0	0
W:\archiv\systems\2021\09\SC\DPOAE_16Sep2021\27\14-59-54-DPOAE.xls	0	0	0	0	0	0						W:\archiv\systems\2021\10\SC\09Oct2021_DPOAE\49\17-34-22-DPOAE.xls	2.72365	5.67201	3.61037	2.90277	3.24866	2.71828
W:\archiv\systems\2021\09\SC\DPOAE_16Sep2021\27\15-1-32-DPOAE.xls	0	0	0	0	0	0						W:\archiv\systems\2021\08\SC\DPOAE22Aug2021\17\17-12-37-DPOAE.xls	0	0	0	0	0	0
W:\archiv\systems\2021\09\SC\DPOAE_16Sep2021\27\15-7-20-DPOAE.xls	4.52555	4.36107	3.59707	2.16026	5.17011	2.68836						W:\archiv\systems\2021\08\SC\DPOAE22Aug2021\17\17-14-9-DPOAE.xls	0	0	0	0	0	0
W:\archiv\systems\2021\03\SC\DPOAE_11Mar2021\63\19-53-56-DPOAE.xls	0	0	0	0	0	0						W:\archiv\systems\2021\08\SC\DPOAE22Aug2021\17\17-16-18-DPOAE.xls	7.53542	2.8918	4.89414	4.10477	3.82825	3.01206
W:\archiv\systems\2021\03\SC\DPOAE_11Mar2021\63\19-58-40-DPOAE.xls	0	6.57421	3.81098	3.28592	3.48471	3.19125						W:\archiv\systems\2021\08\SC\DPOAE22Aug2021\17\17-18-17-DPOAE.xls	0	0	0	0	0	0
W:\archiv\systems\2021\03\SC\10March2021DPOAE\64\17-18-20-DPOAE.xls	0	0	0	0	0	0						W:\archiv\systems\2021\08\SC\DPOAE22Aug2021\17\17-20-10-DPOAE.xls	0	0	0	0	0	0
W:\archiv\systems\2021\03\SC\10March2021DPOAE\64\17-19-24-DPOAE.xls	0	0	0	0	0	0						W:\archiv\systems\2021\08\SC\DPOAE22Aug2021\17\17-21-20-DPOAE.xls	0	0	0	0	0	0
W:\archiv\systems\2021\03\SC\10March2021DPOAE\64\17-24-10-DPOAE.xls	0	3.80652	8.25139	7.56642	7.27387	4.06634
W:\archiv\systems\2021\05\ND\CaBP_1_2\466\DPOAE\466_IO-Fct_12_22kHz_20_60dB_12-46-49-DPOAE.xls	0	4.30426	5.03406	4.568	3.67146	4.63424
W:\archiv\systems\2021\05\ND\CaBP_1_2\466\DPOAE\466_IO-Fct_6_32kHz_40_60dB_12-49-42-DPOAE.xls	0	0	0	0	0	0
W:\archiv\systems\2021\05\ND\CaBP_1_2\468\DPOAE\468_12_16_22kHz_20_60dB_10-14-58-DPOAE.xls	0	3.77539	4.47023	3.58057	3.95607	3.2444
W:\archiv\systems\2021\05\ND\CaBP_1_2\468\DPOAE\468_6_8_32kHz_20_60dB_10-17-59-DPOAE.xls	0	0	0	0	0	0
W:\archiv\systems\2021\05\ND\CaBP_1_2\469\DPOAE\469_IO-Fct_12_22kHz_20_60dB_11-41-9-DPOAE.xls	0	4.1586	5.27246	6.45623	5.83257	2.68233
W:\archiv\systems\2021\05\ND\CaBP_1_2\469\DPOAE\469_IO-Fct_6_32kHz_40_60dB_11-44-12-DPOAE.xls	0	0	0	0	0	0

[truncated: 9 more sheets: DP-13.3333, Noise-13.3333, NoiseStd-13.3333, DP-18.8889, Noise-18.8889, NoiseStd-18.8889, DP-26.6667, Noise-26.6667, NoiseStd-26.6667]
